# Supplementary material for: Confined water in imidazolium based ionic liquids: a supramolecular guest@host complex case
Source: Royal Society of Chemistry journal article supplement (doi:10.1039/c6cp03112a), 2016-01-01
Supplement: c6cp03112a1.pdf [file c6cp03112a1.pdf]

## Supporting Information

### Confined water in imidazolium based ionic liquids: a supramolecular guest@host complex case

Marcileia Zanatta, Anne-Lise Girard, Graciane Marin, Gunter Ebeling, Francisco P. dos Santos, Chiara Valsecchi, Hubert Stassen, Paolo R. Livotto, William Lewis and Jairton Dupont\*

*Institute of Chemistry—UFRGS Av. Bento Gonçalves, 9500 Porto Alegre 91501-970 RS  
(Brazil);*

*School of Chemistry, University of Nottingham, University Park, Nottingham, NG7 2RD  
(UK).*

#### Table of Contents

|                                                            |     |
|------------------------------------------------------------|-----|
| 1. Characterization of Ionic Liquids.....                  | S2  |
| 2. NMR-Spectral Data.....                                  | S6  |
| 2.1. Deuteration after 1h.....                             | S6  |
| 2.2. Deuterium transfer test and water confined prove..... | S11 |
| 2.3. NMR-Spectra <sup>1</sup> H- <sup>1</sup> H NOESY..... | S14 |
| 3. X-Ray Diffraction Analysis for MMMI·Im .....            | S24 |
| 4. DFT Calculations .....                                  | S25 |
| 5. Molecular Dynamics Simulations .....                    | S32 |

## 1. Characterization of Ionic Liquids

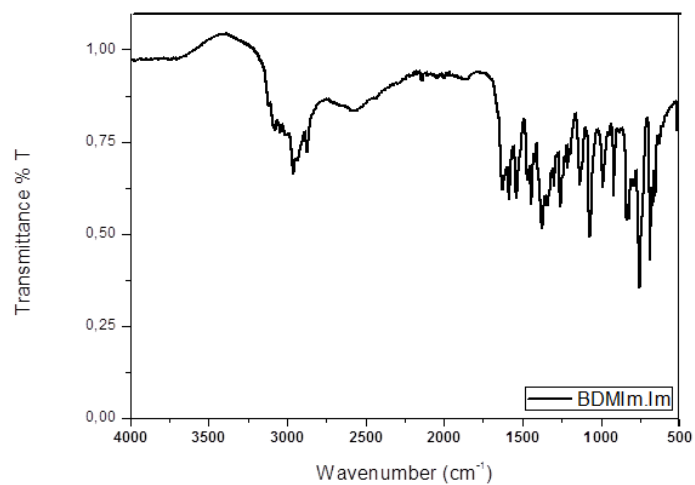

**Figure S1.** IR-ATR spectrum of BMMI·Im.

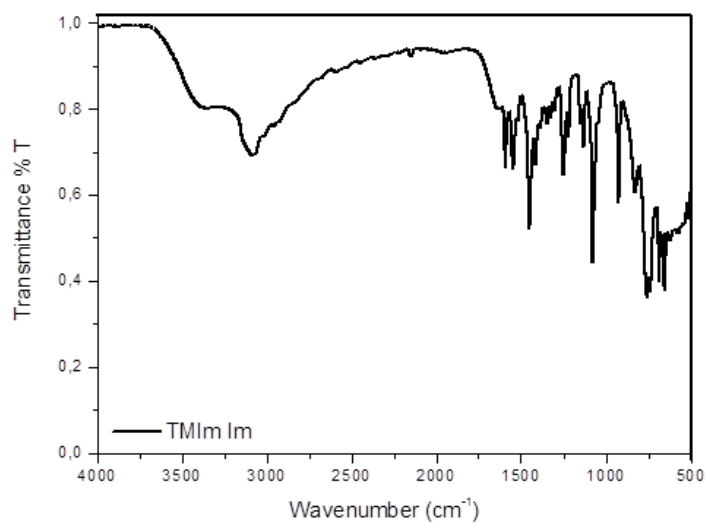

**Figure S2.** IR-ATR spectrum of MMMI·Im.

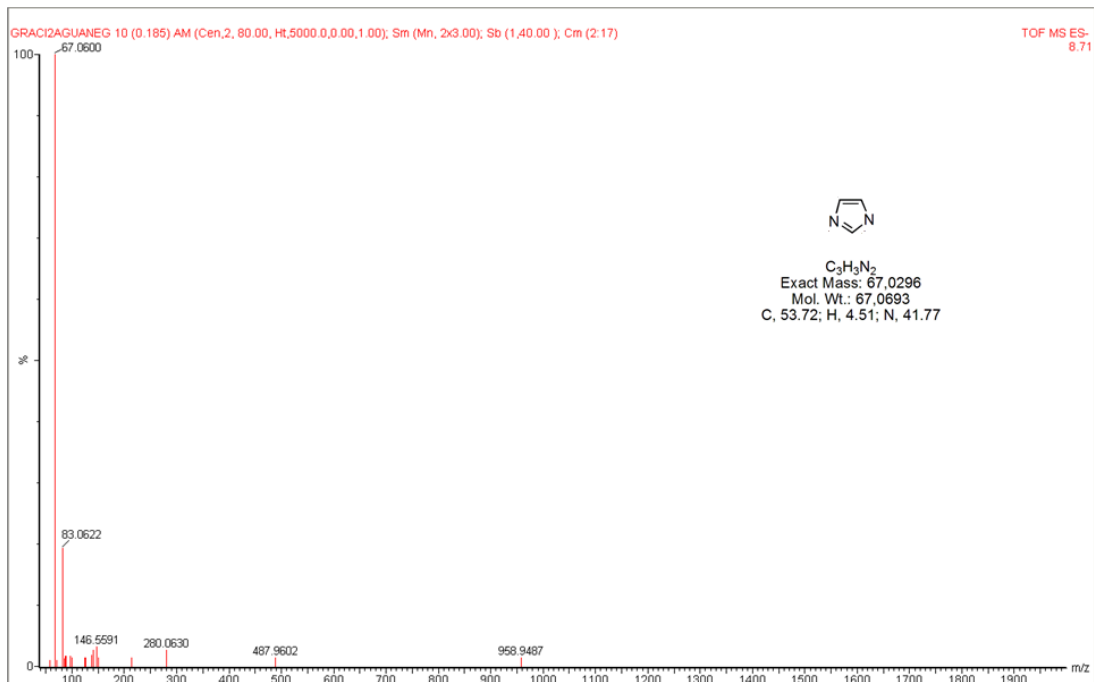

**Figure S3.** HRMS spectrum of MIMI-Im in water negative.

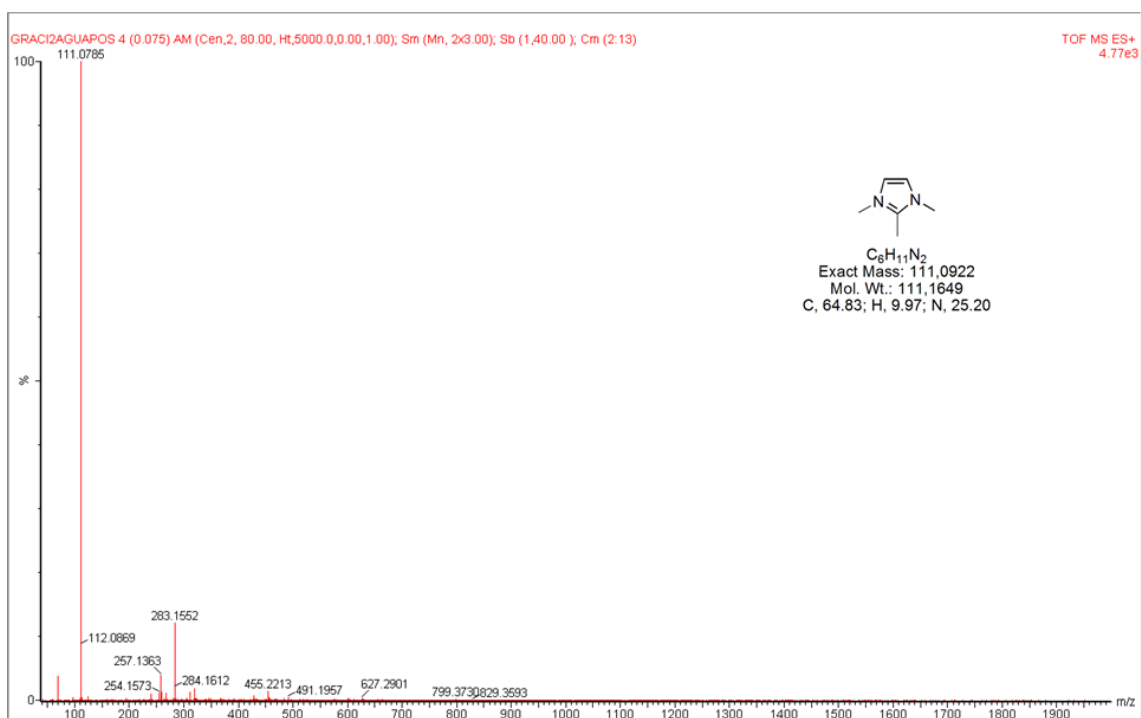

**Figure S4.** HRMS spectrum of MIMI-Im in water positive.

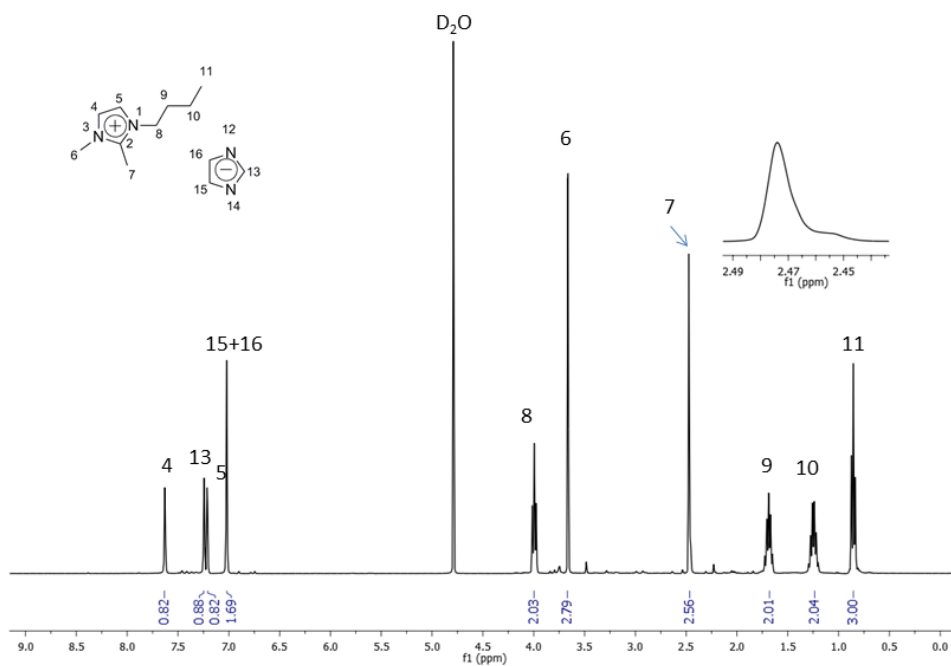

**Figure S5.**  $^1\text{H-NMR}$  (400 MHz, 25 °C) spectrum of BMMI·Im in  $\text{D}_2\text{O}$  (1 M).

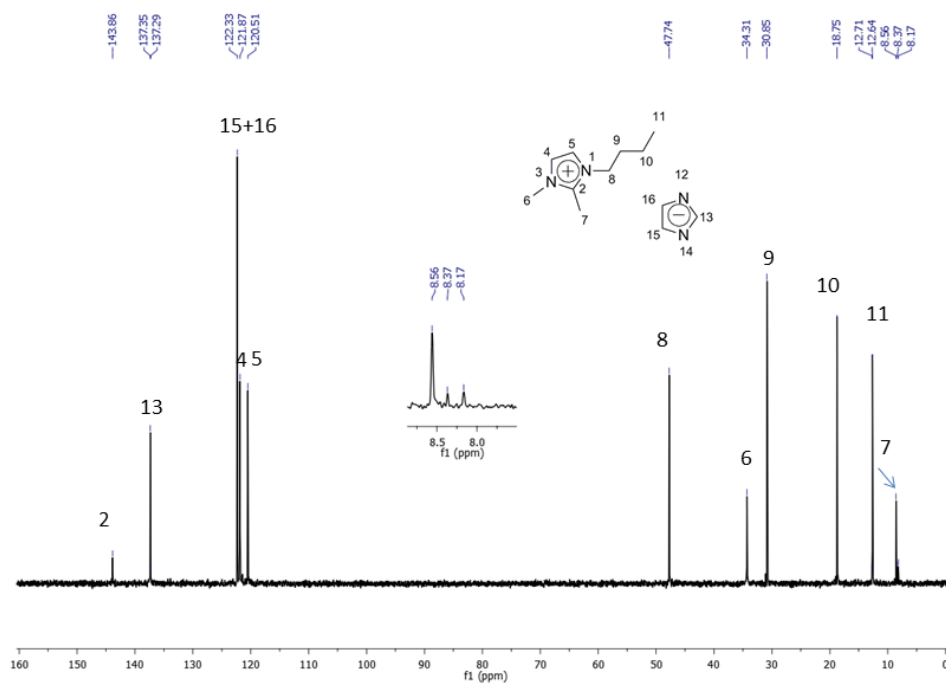

**Figure S6.**  $^{13}\text{C}\{^1\text{H}\}$ -NMR (100.6 MHz, 25 °C) spectrum of BMMI·Im in  $\text{D}_2\text{O}$  (1 M).

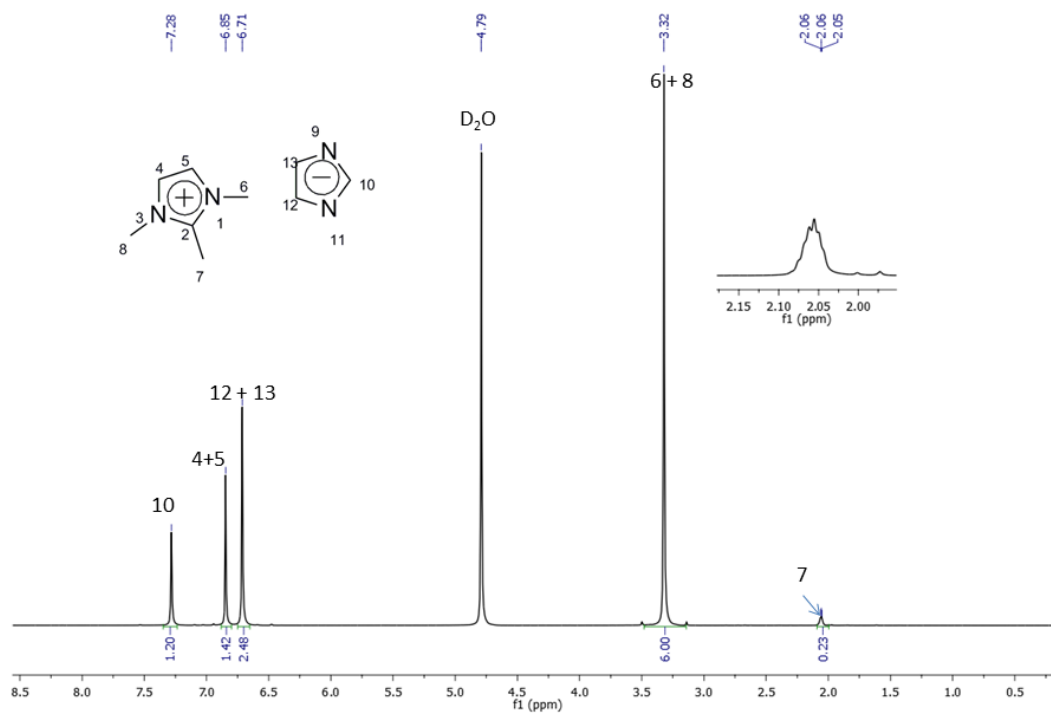

**Figure S7.**  $^1\text{H-NMR}$  (400 MHz, 25 °C) spectrum of  $\text{MMMI}\cdot\text{Im}$  in  $\text{D}_2\text{O}$  (1 M).

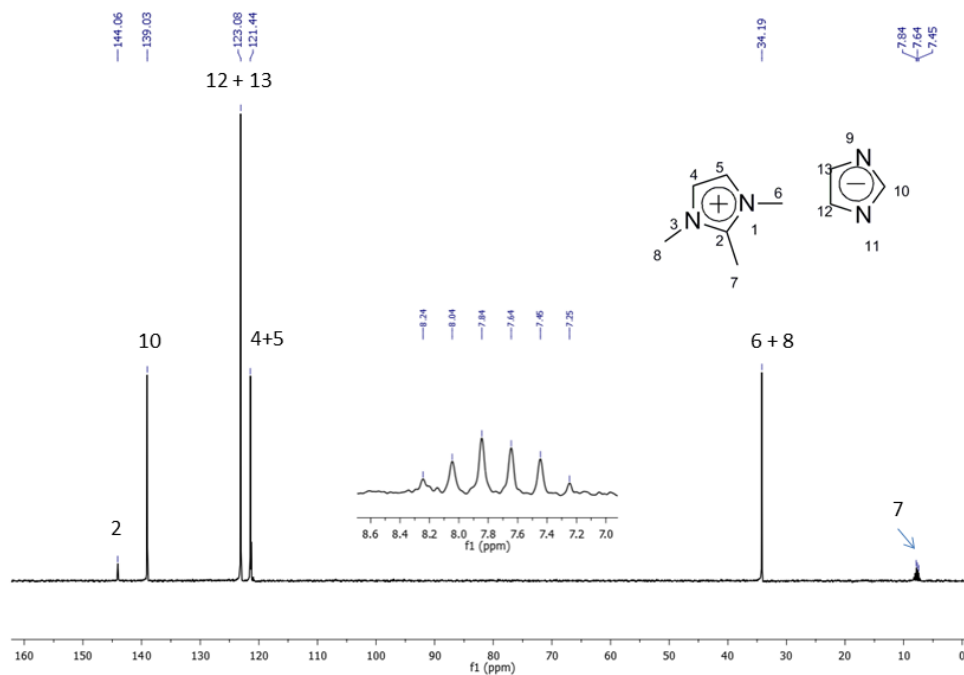

**Figure S8.**  $^{13}\text{C}\{^1\text{H}\}$ -NMR (100.6 MHz, 25 °C) spectrum of  $\text{MMMI}\cdot\text{Im}$  in  $\text{D}_2\text{O}$  (1 M).

## 2. NMR-Spectral Data

### 2.1. Deuteration after 1h

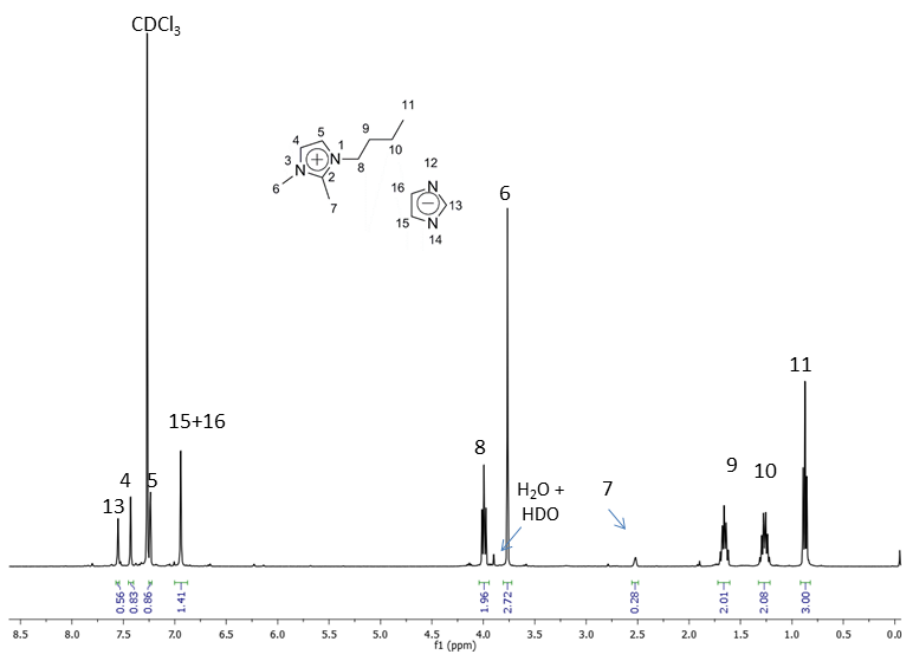

**Figure S9.** <sup>1</sup>H-NMR (400 MHz, 25 °C) spectrum of BMMI·Im in CDCl<sub>3</sub> (0.2 M) after 1h.

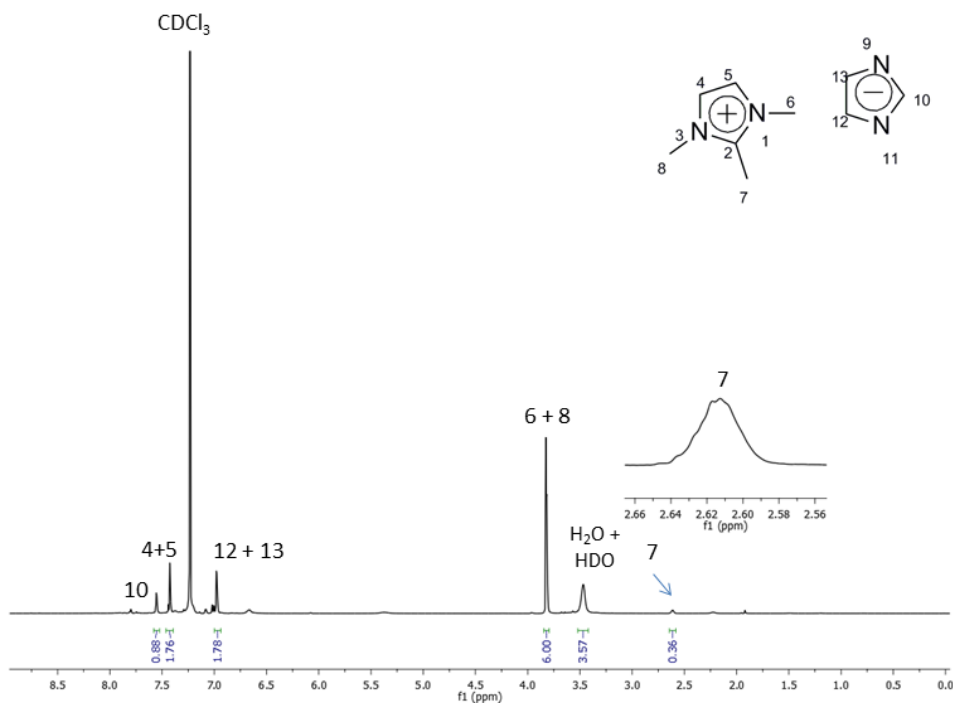

**Figure S10.** <sup>1</sup>H-NMR (400 MHz, 25 °C) spectrum of MMMI·Im in CDCl<sub>3</sub> (0.2 M) after 1h.

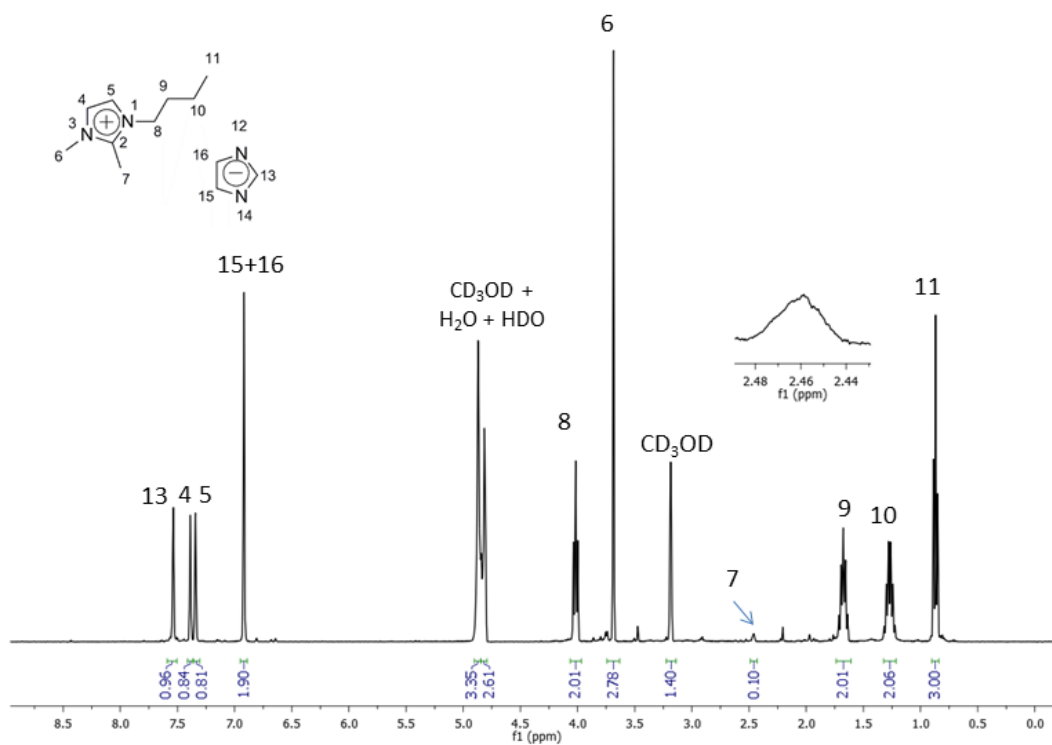

**Figure S11.** <sup>1</sup>H-NMR (100.6 MHz, 25 °C) spectrum of BMMI·Im in CD<sub>3</sub>OD (0.2 M) after 1h.

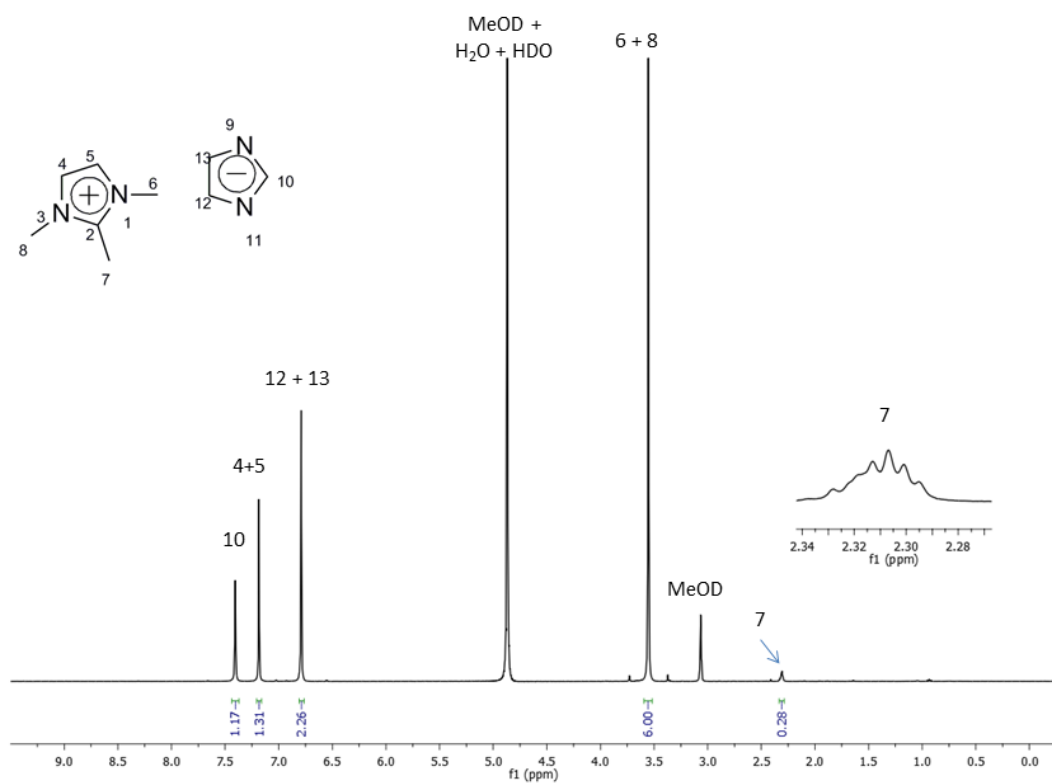

**Figure S12.** <sup>1</sup>H-NMR (400 MHz, 25 °C) spectrum of MMMI·Im in CD<sub>3</sub>OD (0.2 M) after 1h.

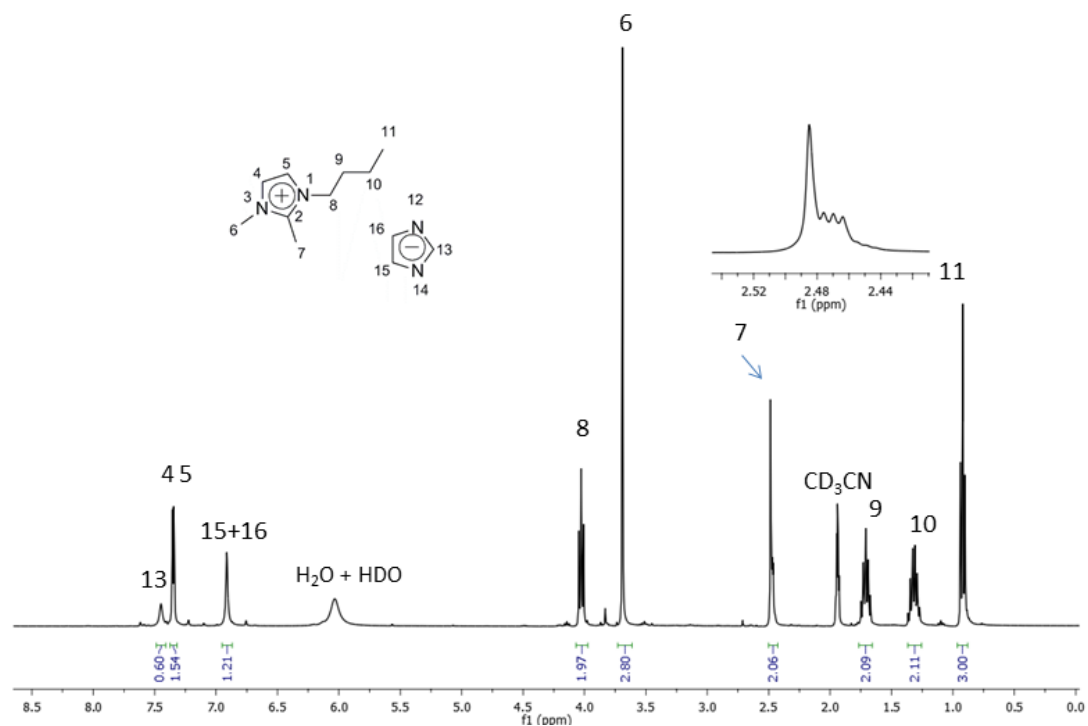

**Figure S13.**  $^1\text{H-NMR}$  (400 MHz, 25 °C) spectrum of BMMI·Im in  $\text{CD}_3\text{CN}$  (0.2 M) after 1h.

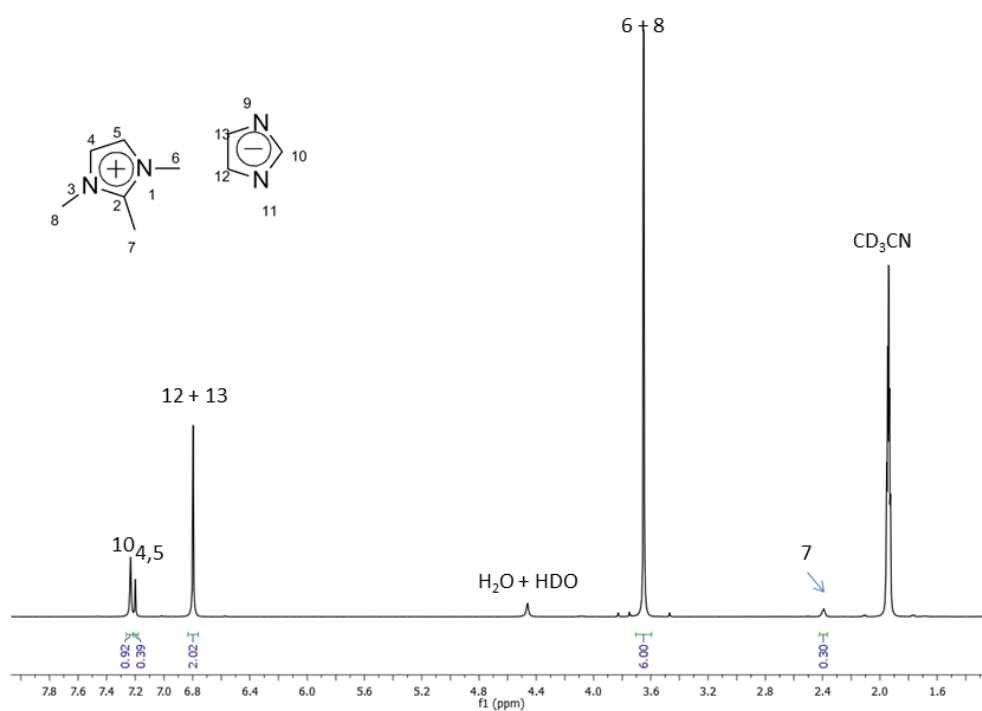

**Figure S14.**  $^1\text{H-NMR}$  (400 MHz, 25 °C) spectrum of MMMI·Im in  $\text{CD}_3\text{CN}$  (0.2 M) after 1h.



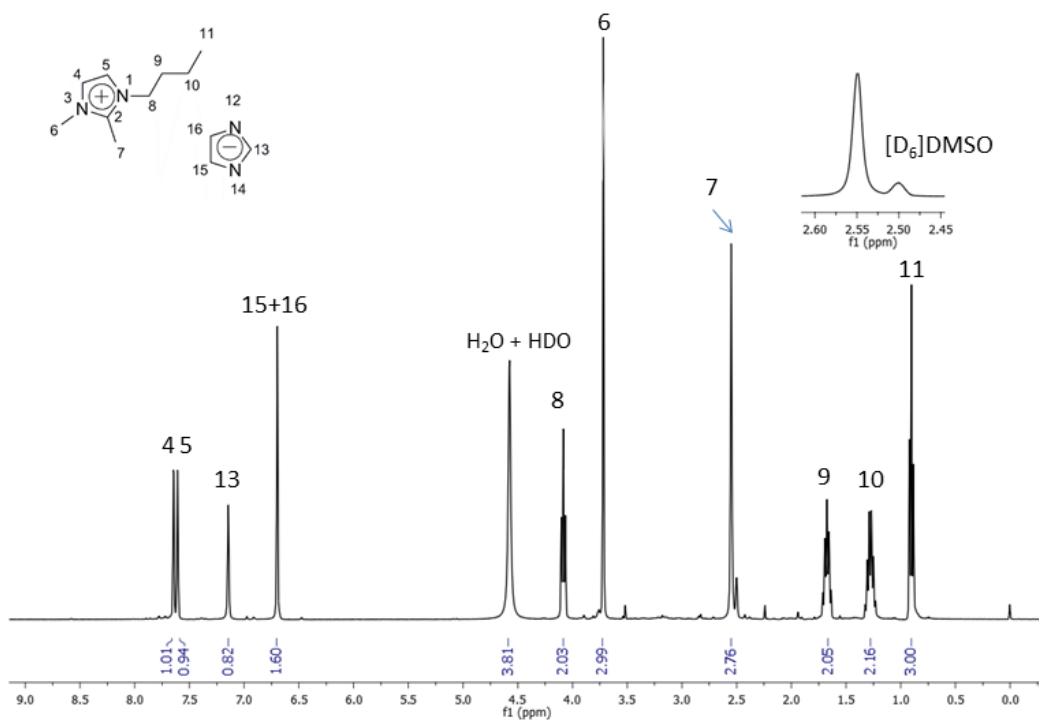

**Figure S15.**  $^1\text{H-NMR}$  (400 MHz, 25 °C) spectrum of BMMI·Im in  $[\text{D}_6]\text{DMSO}$  (0.2 M) after 1h.

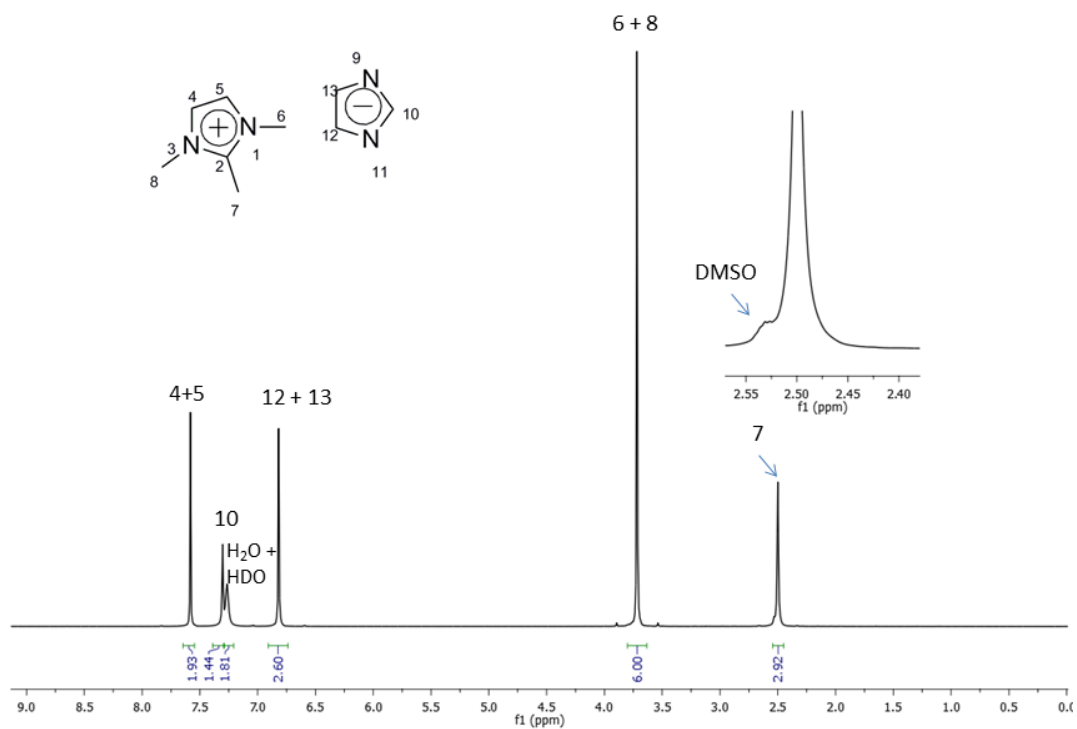

**Figure S16.**  $^1\text{H-NMR}$  (400 MHz, 25 °C) spectrum of MMMI·Im in  $[\text{D}_6]\text{DMSO}$  (0.2 M) after 1h.

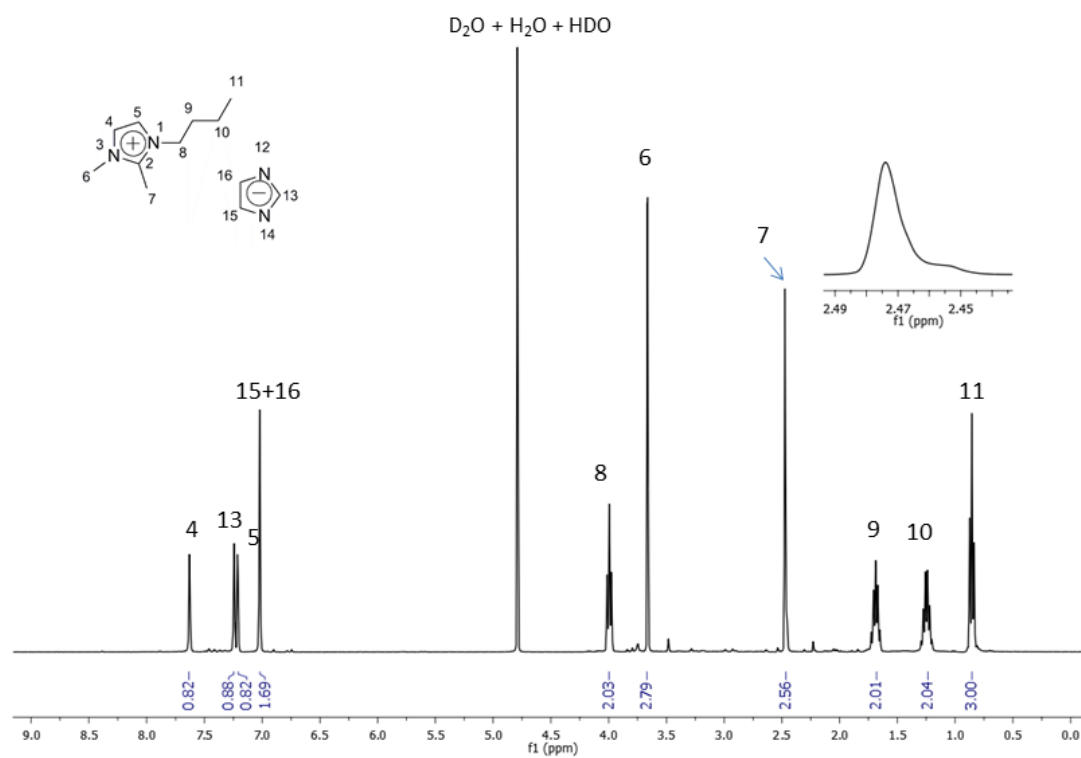

**Figure S17.** <sup>1</sup>H-NMR (400 MHz, 25 °C) spectrum of BMMI·Im in D<sub>2</sub>O (0.2 M) after 1h.

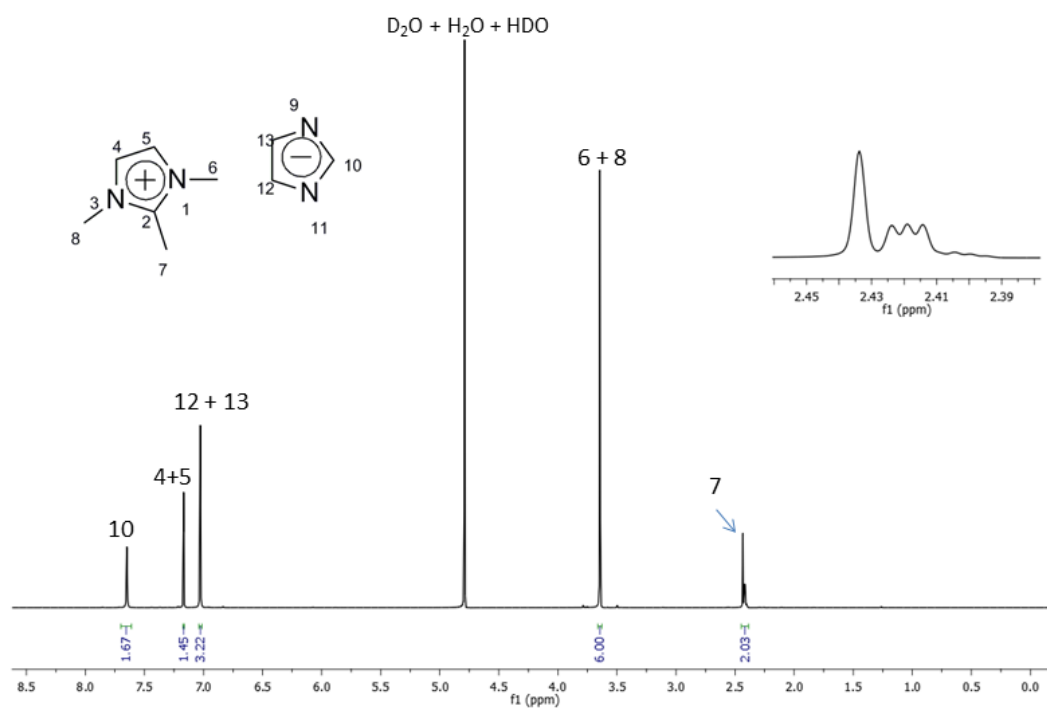

**Figure S18.** <sup>1</sup>H-NMR (400 MHz, 25 °C) spectrum of MMMI·Im in D<sub>2</sub>O (0.2 M) after 1h.

## 2.2. Deuterium transfer test and water confined prove

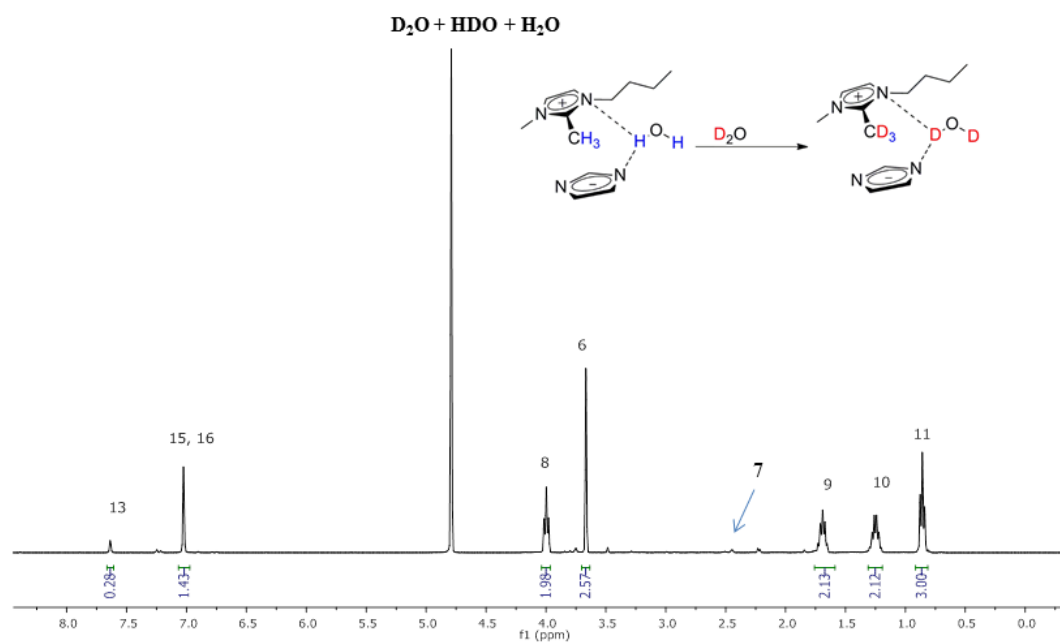

**Figure S19.**  $^1H$ -NMR (400 MHz, 25 °C) spectrum of BMMI·Im in  $D_2O$  (2 M) after 2h.

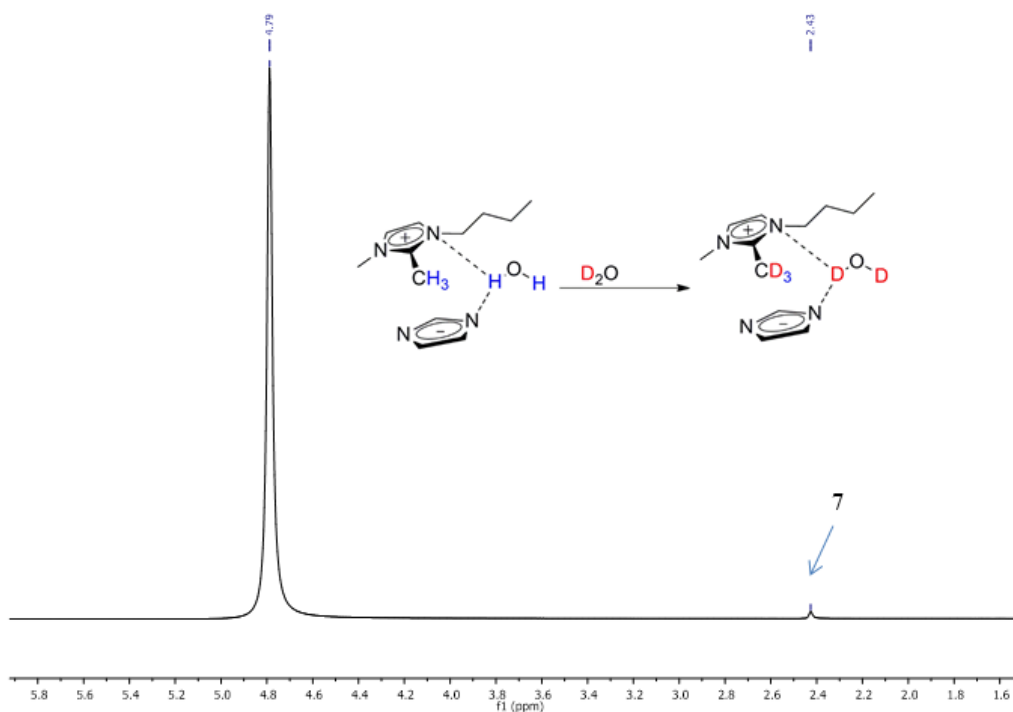

**Figure S20.**  $^2H$ -NMR (61.4 MHz, 25 °C) spectrum of BMMI·Im in  $D_2O$  (2 M) after 2h.

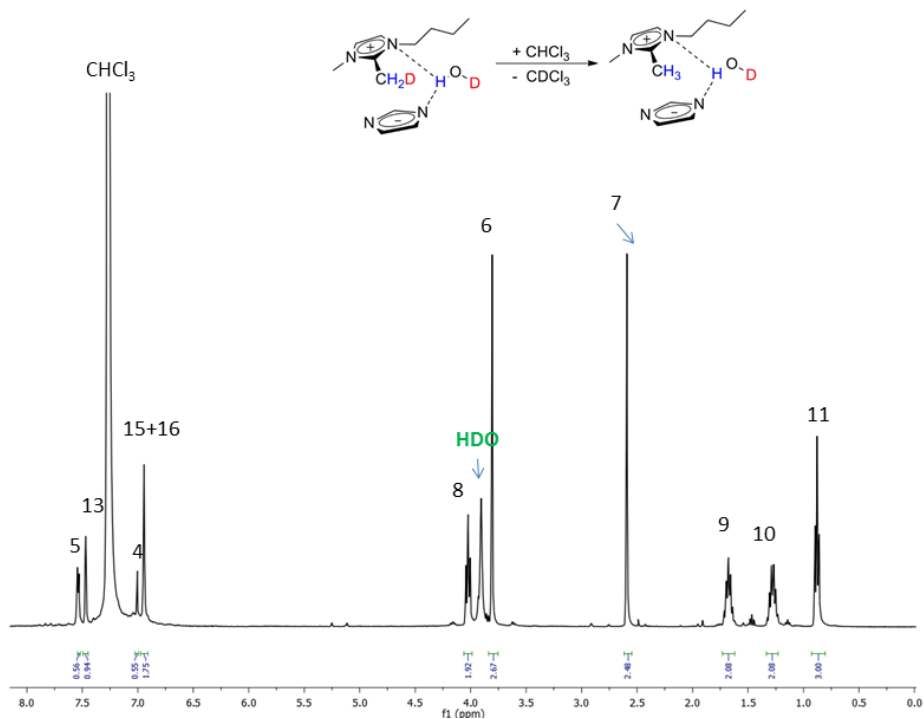

**Figure S21.**  $^1\text{H}$ -NMR (400 MHz, 25 °C) spectrum of BMMI-Im in  $\text{CHCl}_3$  (0.5 M) ( $[\text{D}_6]$ DMSO capillary).

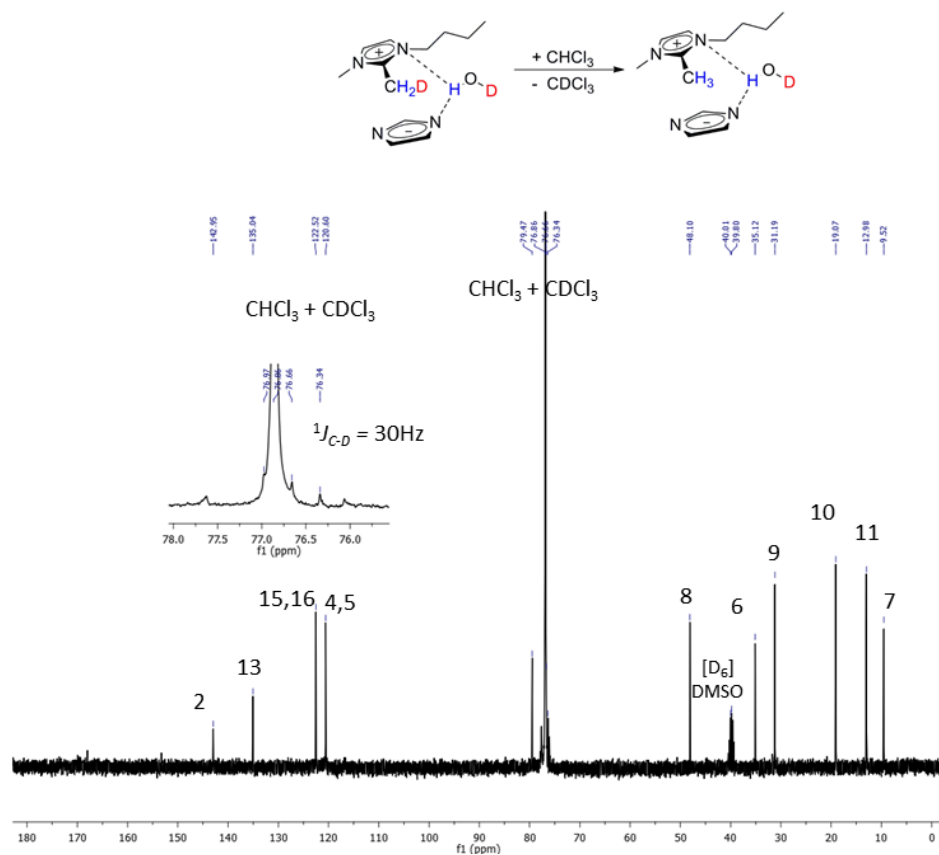

**Figure S22.**  $^{13}\text{C}\{^1\text{H}\}$ -NMR (100.6 MHz, 25 °C) spectrum of BMMI-Im in  $\text{CHCl}_3$  (0.5 M) ( $[\text{D}_6]$ DMSO capillary).

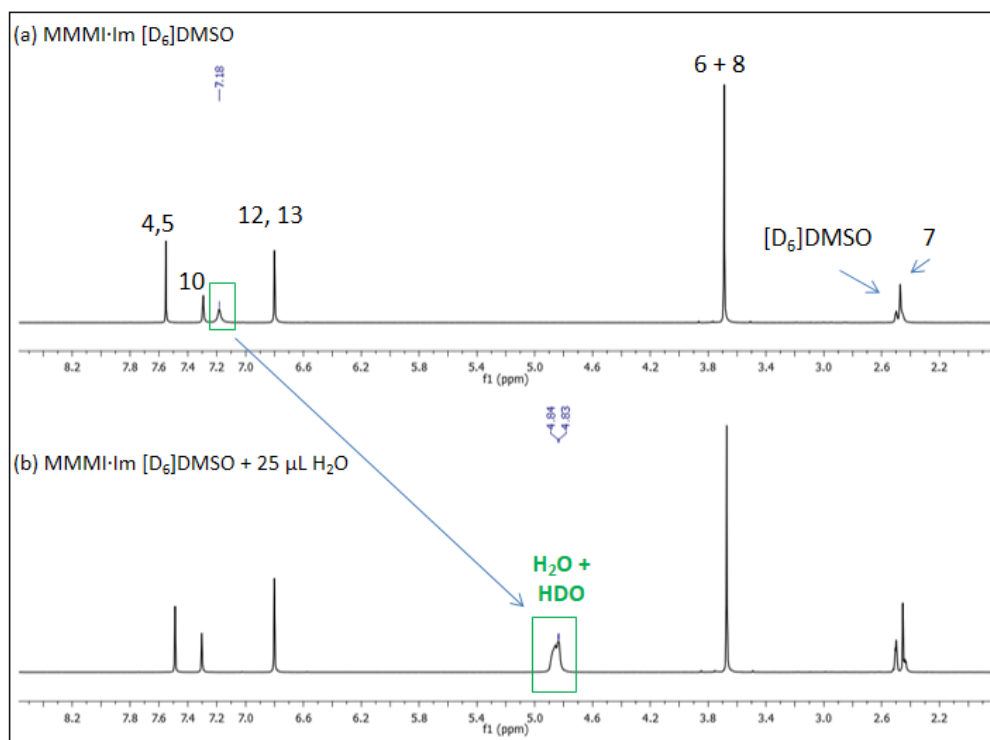

**Figure S23.**  $^1\text{H}$  NMR (400 MHz, 25 °C) spectrum of MMMI·Im in  $[\text{D}_6]\text{DMSO}$  (1 M) after 72h: without water (**a**), addition of 25  $\mu\text{L}$   $\text{H}_2\text{O}$  (**b**).

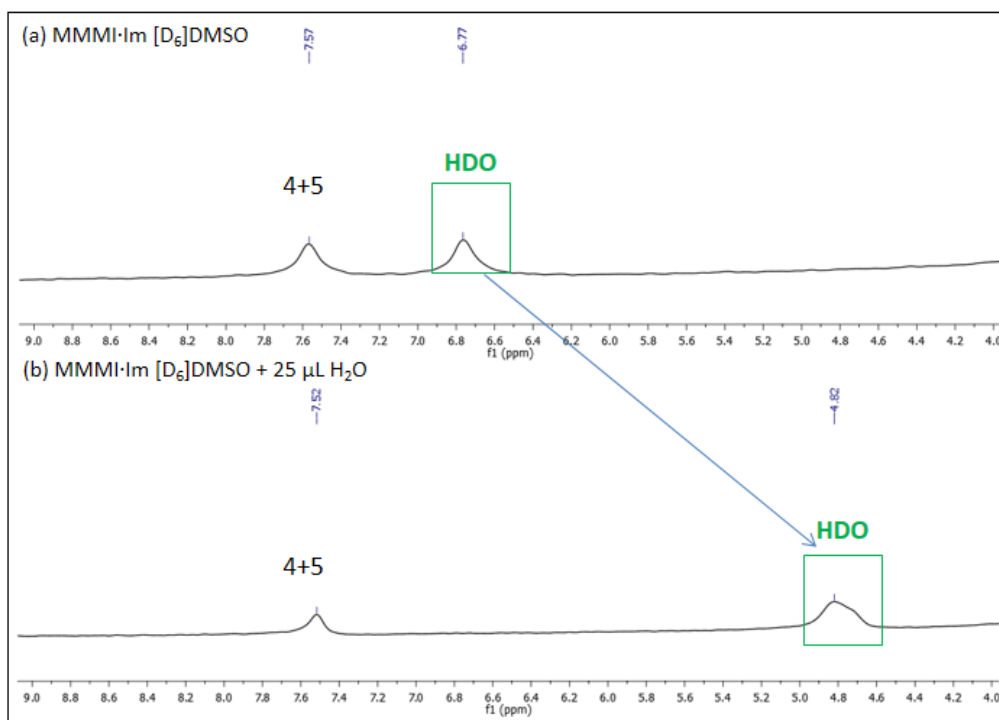

**Figure S24.**  $^2\text{H}$ -NMR (61.4 MHz, 25 °C) spectrum of MMMI·Im in  $[\text{D}_6]\text{DMSO}$  (1 M) after 72h: without water (**a**), addition of 25  $\mu\text{L}$   $\text{H}_2\text{O}$  (**b**).

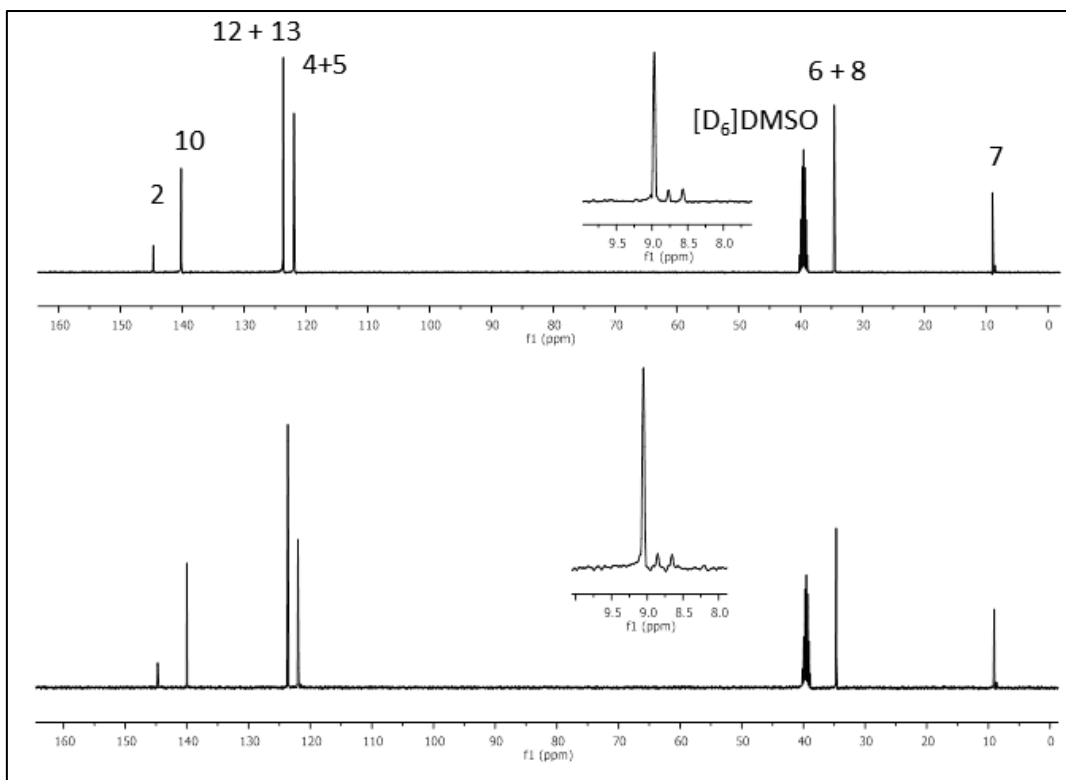

**Figure S25.**  $^{13}\text{C}\{^1\text{H}\}$  NMR (100.6 MHz, 25 °C) spectrum of MMMI-Im in  $[\text{D}_6]\text{DMSO}$  (1 M) after 72h: without water (top), addition of 25  $\mu\text{L}$   $\text{H}_2\text{O}$  (bottom).

### 2.3. NMR-Spectra $^1\text{H}$ - $^1\text{H}$ NOESY

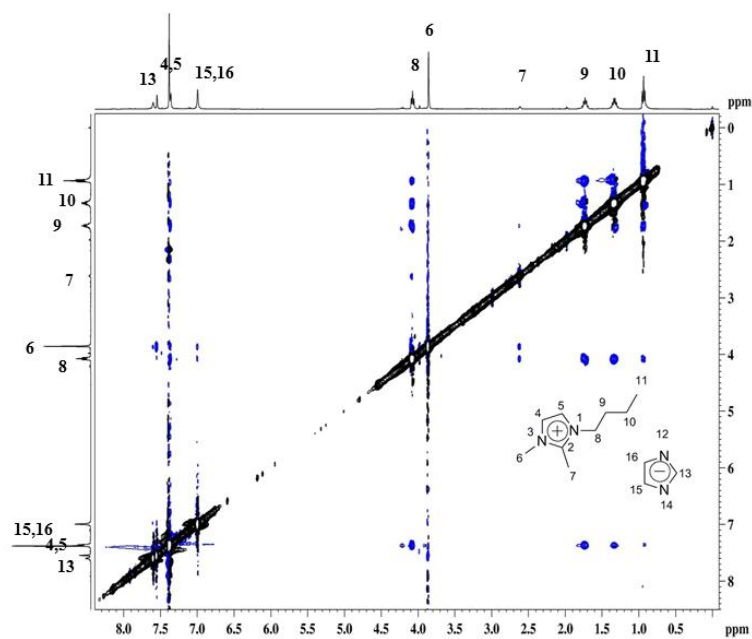

**Figure S26.**  $^1\text{H}$ - $^1\text{H}$  NOESY NMR (400 MHz, 25 °C) spectrum of BMMI-Im in  $\text{CDCl}_3$ , (0.2 M) after 1h.

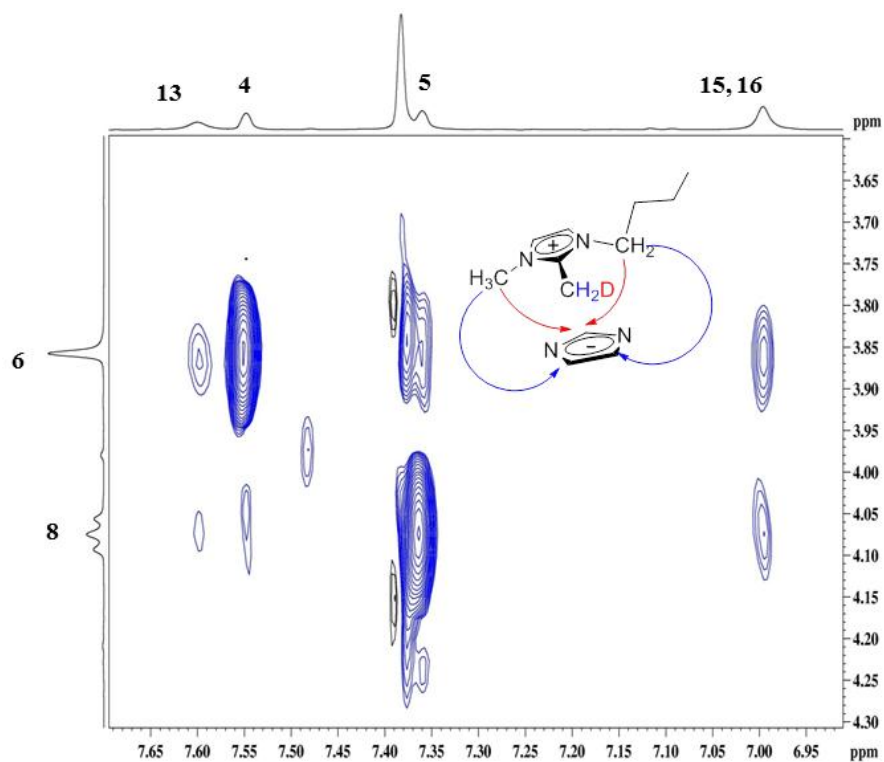

**Figure S26.1.**  $^1\text{H}$ - $^1\text{H}$  NOESY NMR (400 MHz, 25 °C) spectrum of BMMI·Im in  $\text{CDCl}_3$ , (0.2 M) after 1h, expansion of H6 and H8.

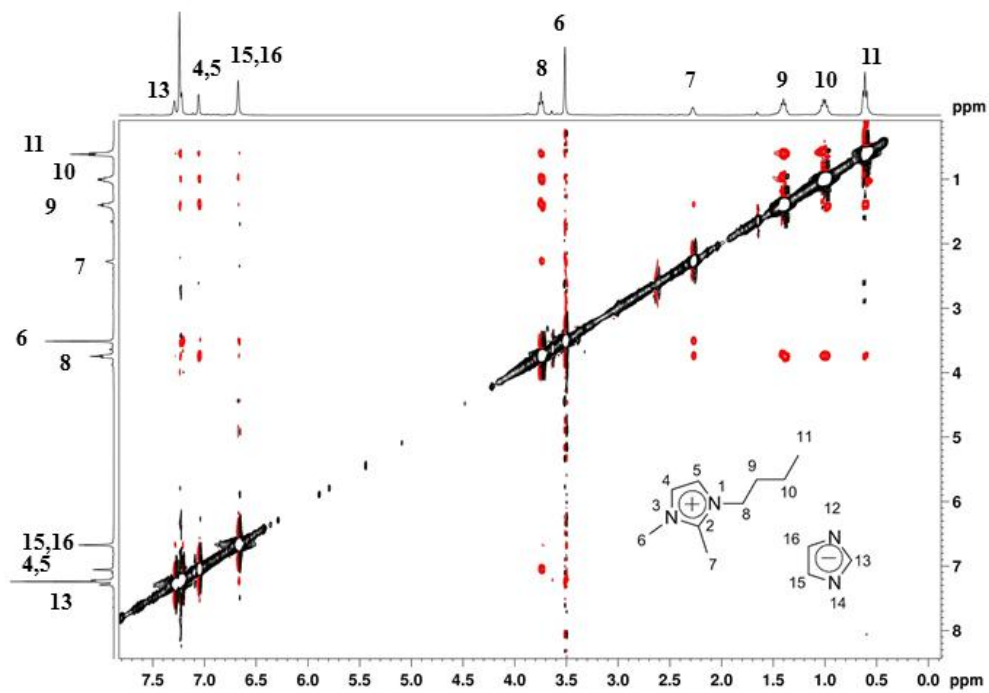

**Figure S27.**  $^1\text{H}$ - $^1\text{H}$  NOESY NMR (400 MHz, 25 °C) spectrum of BMMI·Im in  $\text{CDCl}_3$ , (1 M) after 1h.

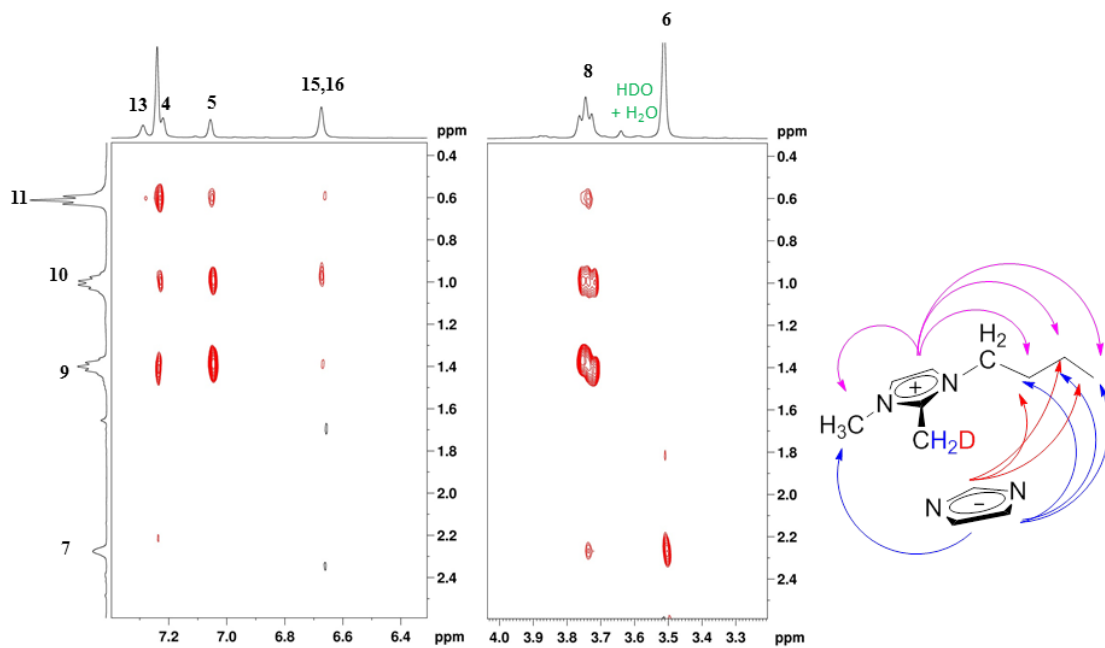

**Figure S27.1.**  $^1\text{H}$ - $^1\text{H}$  NOESY NMR (400 MHz, 25 °C) spectrum of BMMI·m expansion in  $\text{CDCl}_3$ , (1 M) after 1h.

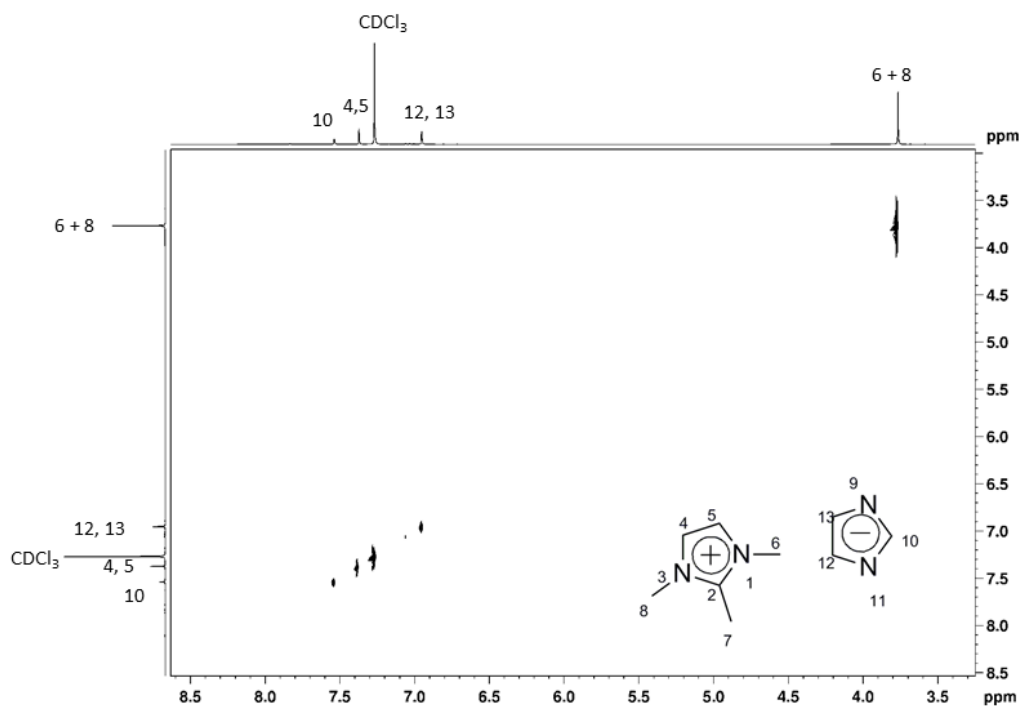

**Figure S28.**  $^1\text{H}$ - $^1\text{H}$  NOESY NMR (400 MHz, 25 °C) spectrum of MMMI·Im in  $\text{CDCl}_3$ , (0.2 M) after 1h.



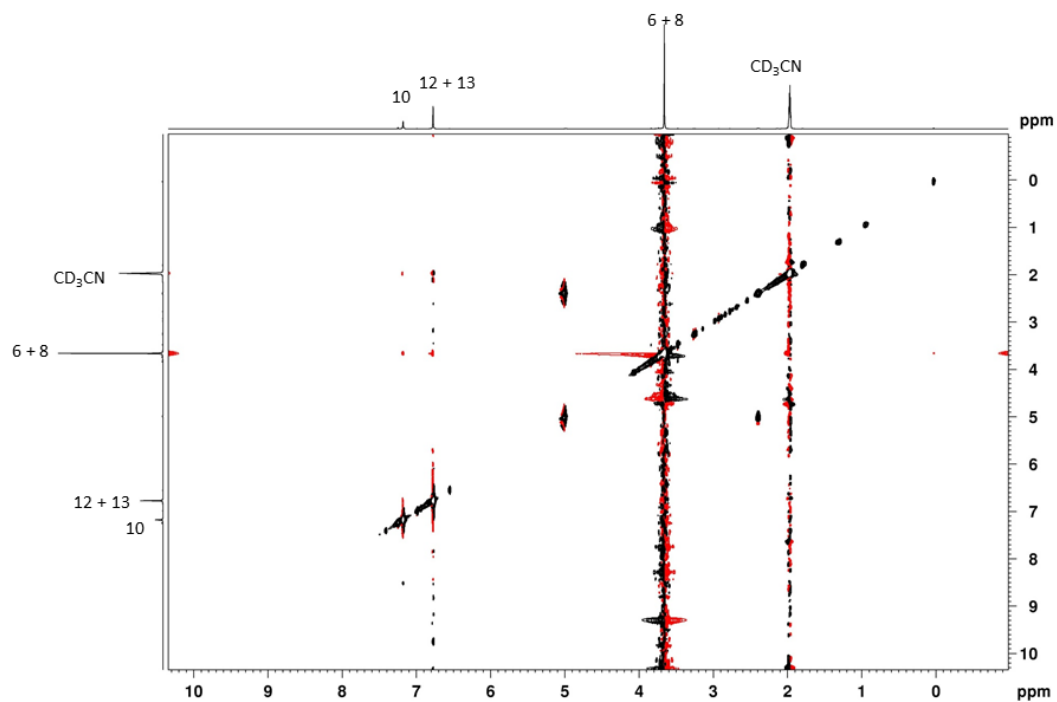

**Figure S29.**  $^1\text{H}$ - $^1\text{H}$  NOESY NMR (400 MHz, 25 °C) spectrum of MMMI·Im in  $\text{CD}_3\text{CN}$  (0.2 M) after 1h.

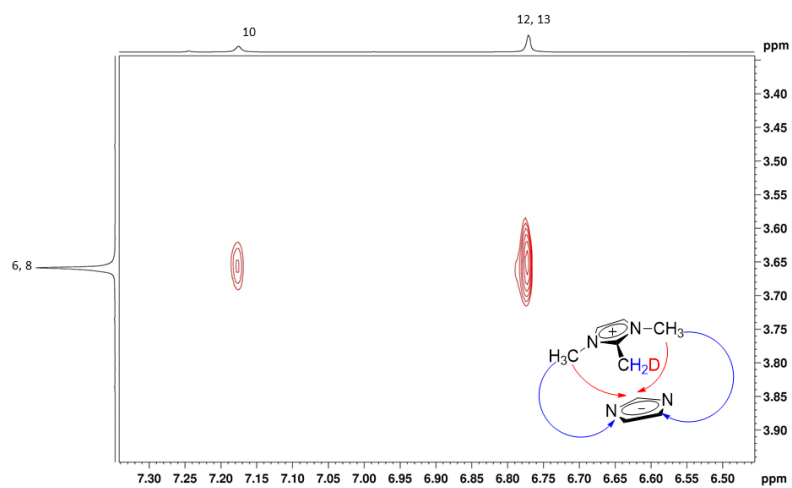

**Figure S29.1.**  $^1\text{H}$ - $^1\text{H}$  NOESY NMR (400 MHz, 25 °C) spectrum of MMMI·Im in  $\text{CD}_3\text{CN}$  (0.2 M) after 1h, expansion of H6/H8.

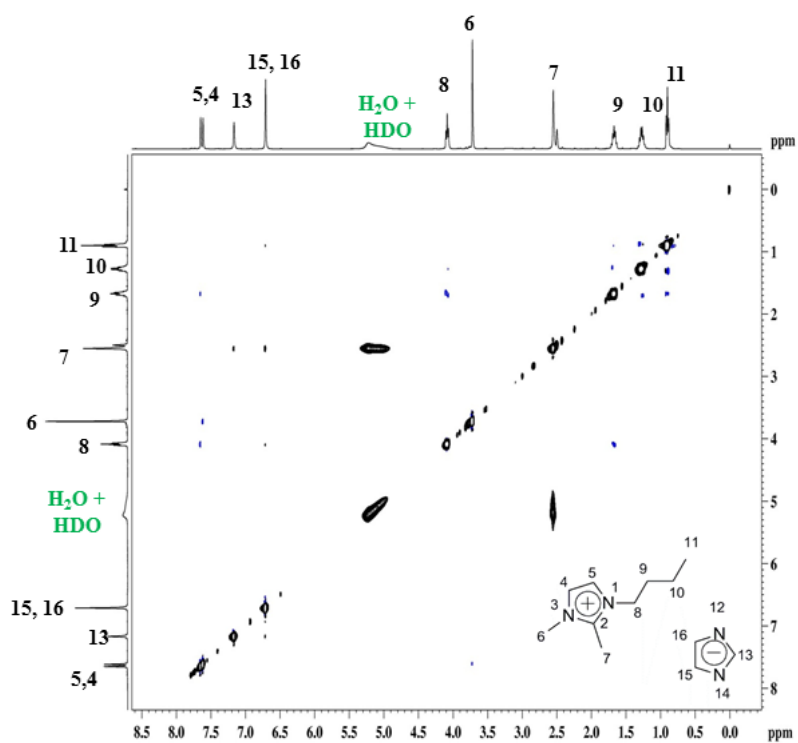

**Figure S30.**  $^1\text{H}$ - $^1\text{H}$  NOESY NMR (400 MHz, 25 °C) spectrum of BMMI·Im in  $[\text{D}_6]$ DMSO (0.2 M) after 1h.

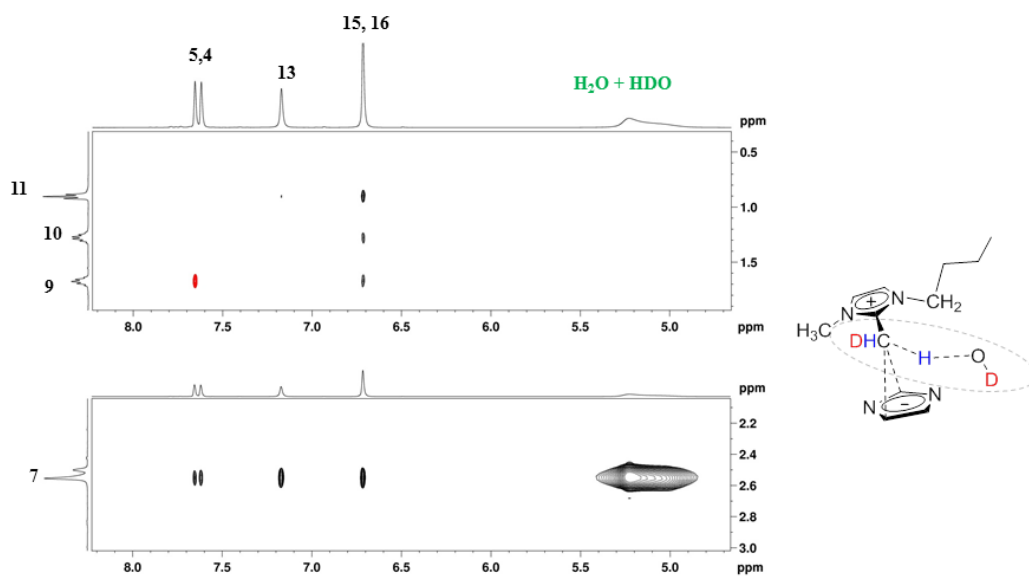

**Figure S30.1.**  $^1\text{H}$ - $^1\text{H}$  NOESY NMR (400 MHz, 25 °C) spectrum of BMMI·Im in  $[\text{D}_6]$ DMSO (0.2 M) after 1h, expansion (water exchange).

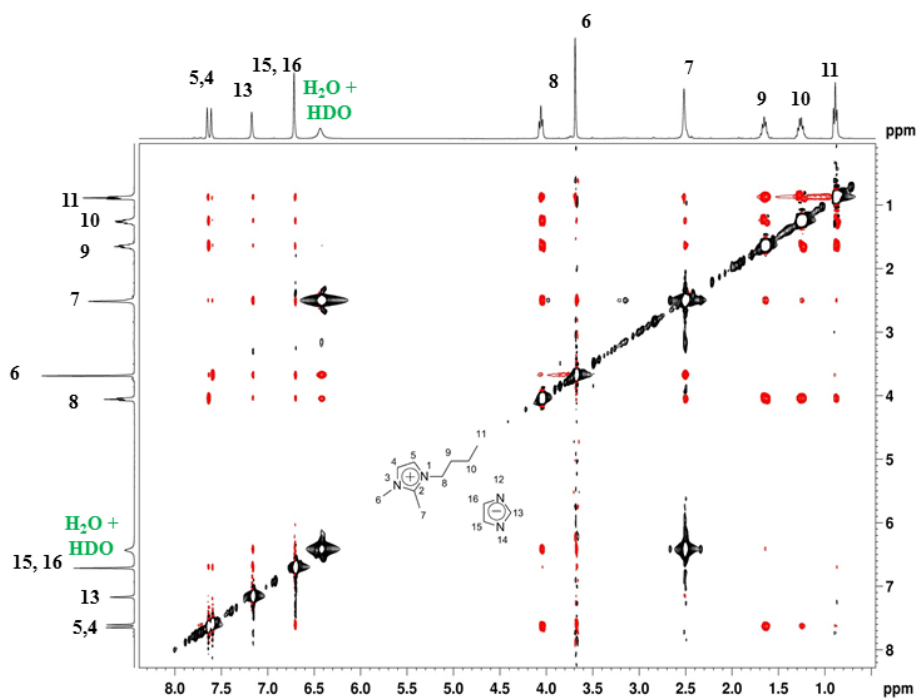

**Figure S31.**  $^1\text{H}$ - $^1\text{H}$  NOESY NMR (400 MHz, 25 °C) spectrum of BMMI-Im in  $[\text{D}_6]\text{DMSO}$  (1 M) after 1h.

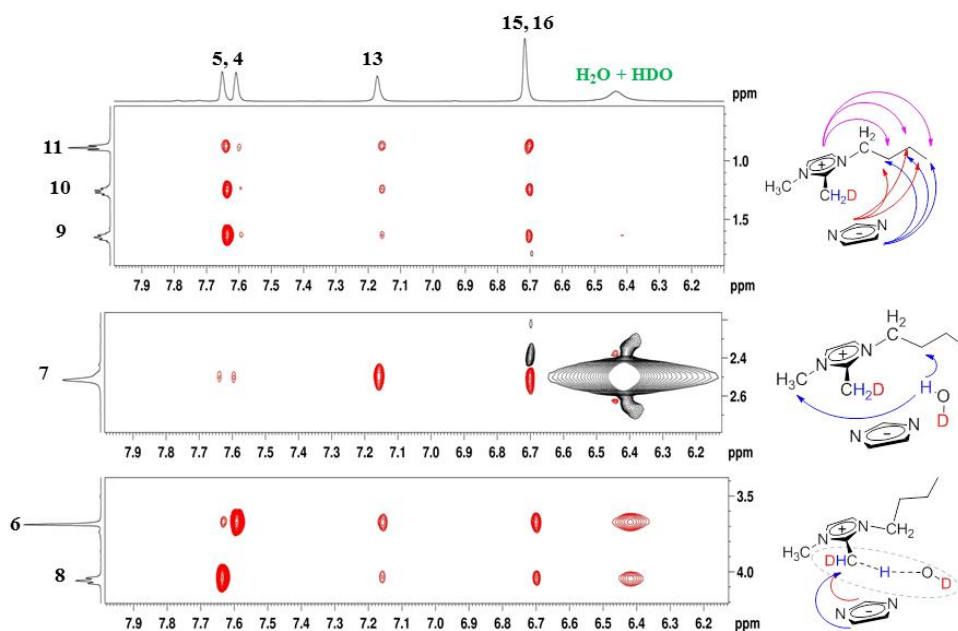

**Figure S31.1.**  $^1\text{H}$ - $^1\text{H}$  NOESY NMR (400 MHz, 25 °C) spectrum of BMMI-Im in  $[\text{D}_6]\text{DMSO}$  (1 M), expansion (water exchange).

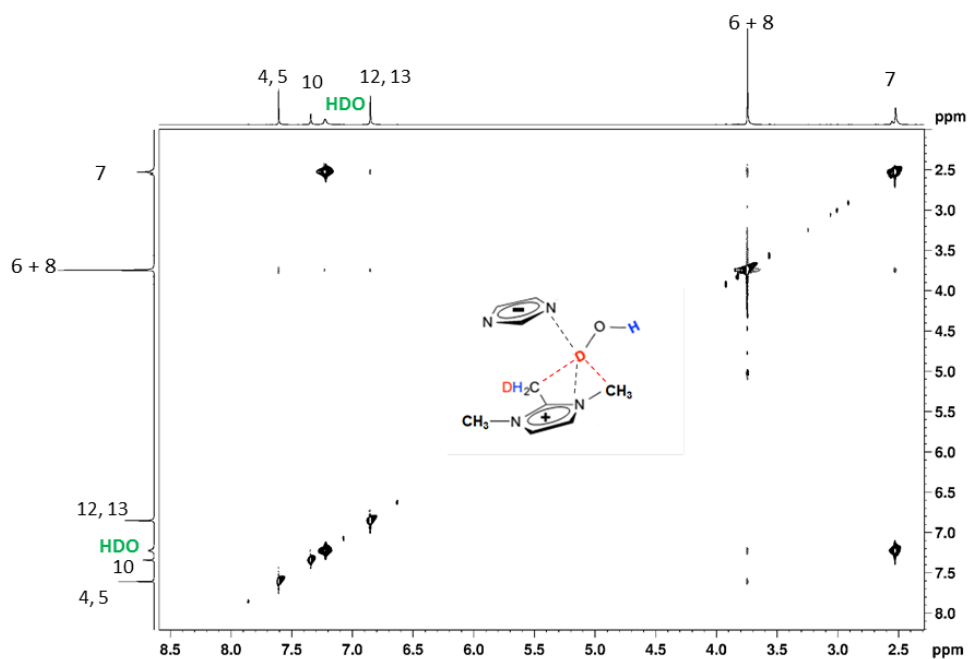

**Figure S32.**  $^1\text{H}$ - $^1\text{H}$  NOESY NMR (400 MHz, 25 °C) spectrum of MMMI·Im in  $[\text{D}_6]$ DMSO (1 M) after 72h.

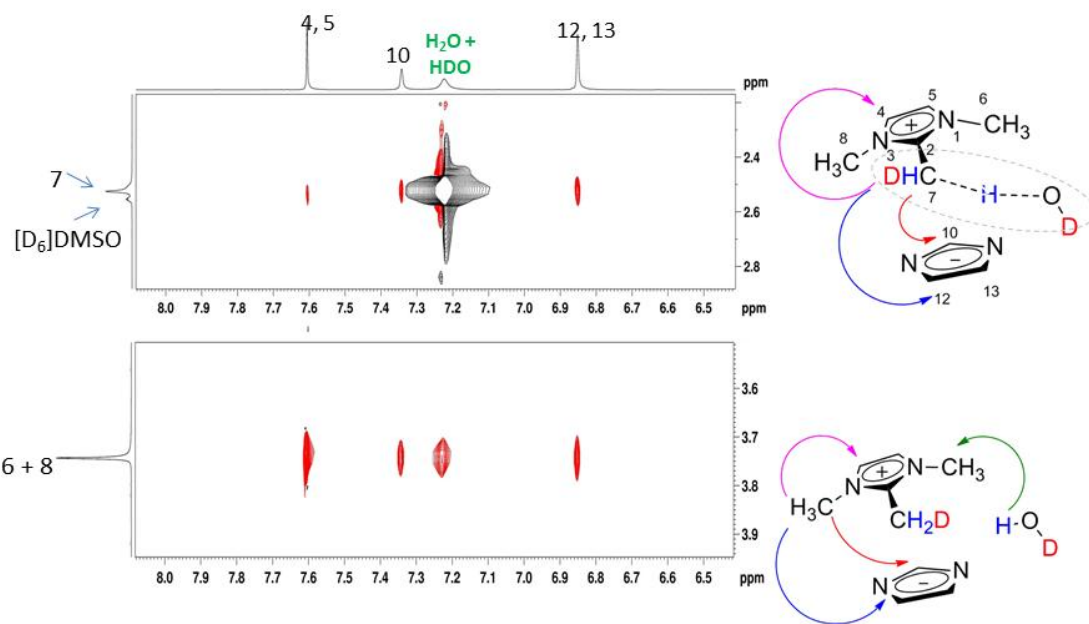

**Figure S32.1.**  $^1\text{H}$ - $^1\text{H}$  NOESY NMR (400 MHz, 25 °C) spectrum of MMMI·Im in  $[\text{D}_6]$ DMSO (1 M) after 72h, expansion of H6/H8 and H7 (water exchange).

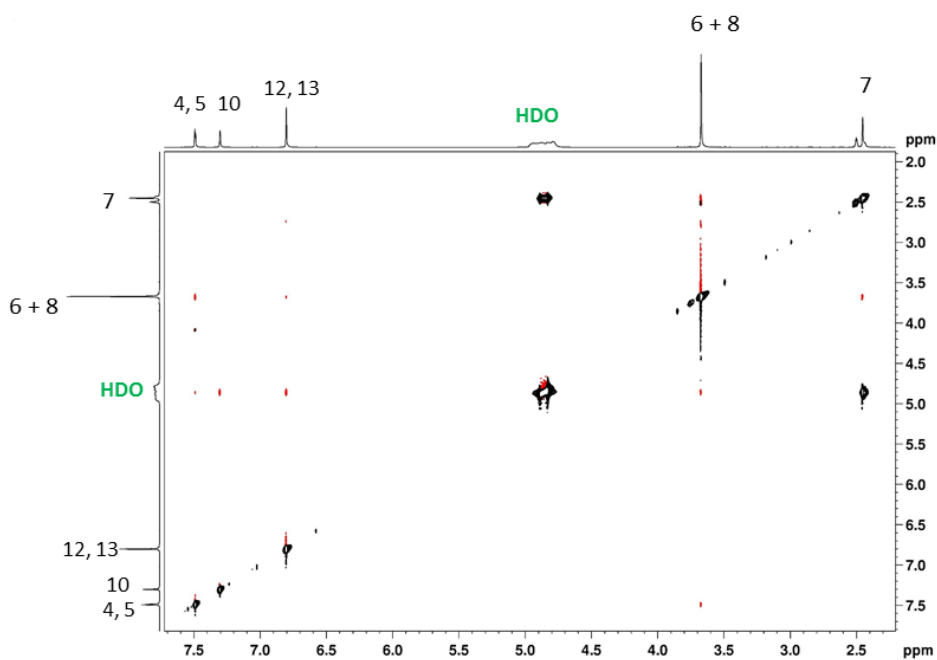

**Figure S33.**  $^1\text{H}$ - $^1\text{H}$  NOESY NMR (400 MHz, 25 °C) spectrum of MMMI-Im in  $[\text{D}_6]$ DMSO (1 M) and 25  $\mu\text{L}$   $\text{H}_2\text{O}$  after 72h.

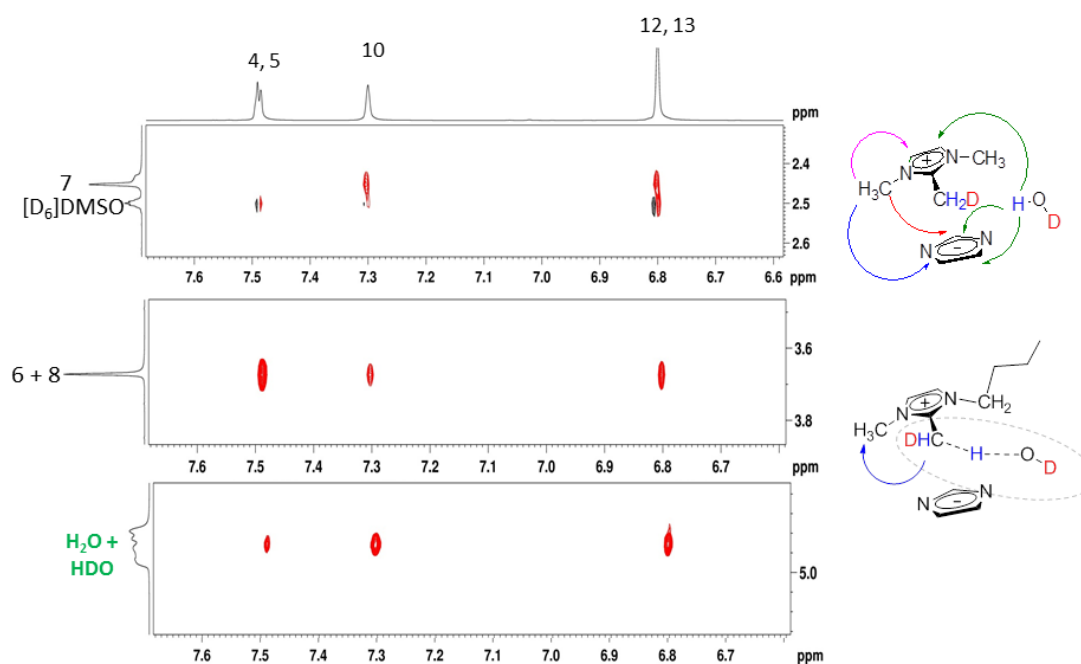

**Figure S33.**  $^1\text{H}$ - $^1\text{H}$  NOESY NMR (400 MHz, 25 °C) spectrum of MMMI-Im in  $[\text{D}_6]$ DMSO (1 M) and 25  $\mu\text{L}$   $\text{H}_2\text{O}$  after 72h, expansion of H6/H8 (water exchange).

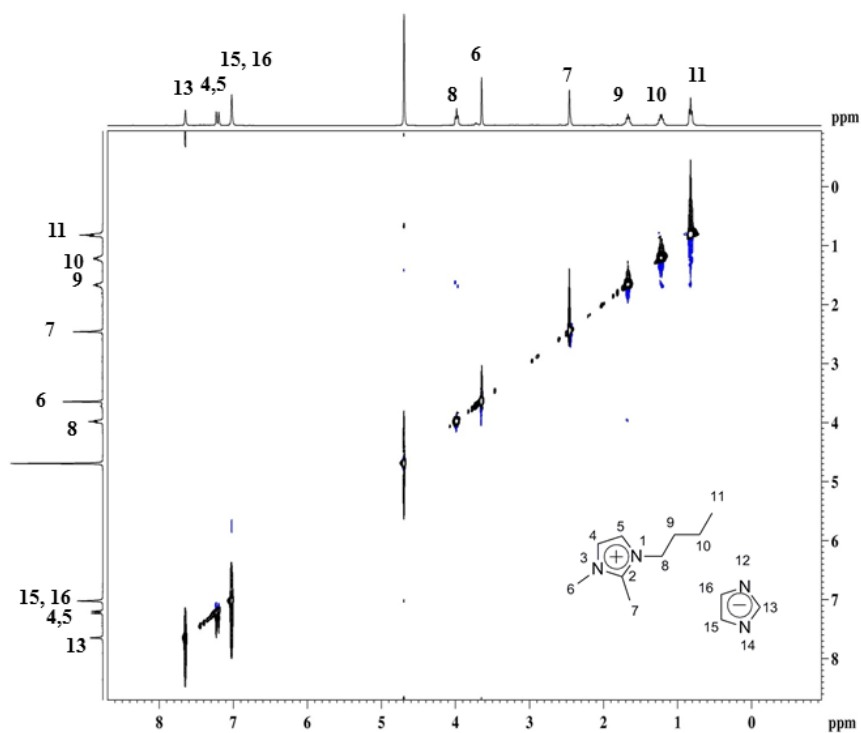

**Figure S34.**  $^1\text{H}$ - $^1\text{H}$  NOESY NMR (400 MHz, 25 °C) spectrum of BMMI-Im in  $\text{D}_2\text{O}$  (0.2 M) after 1h.

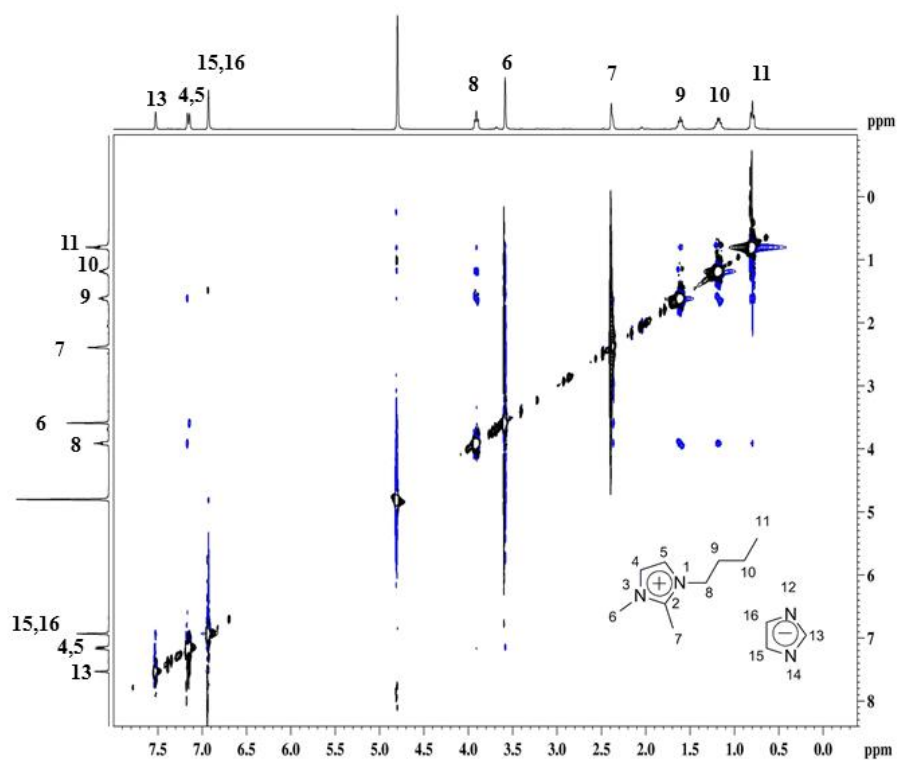

**Figure S35.**  $^1\text{H}$ - $^1\text{H}$  NOESY NMR (400 MHz, 25 °C) spectrum of BMMI-Im in  $\text{D}_2\text{O}$  (1 M) after 1h.

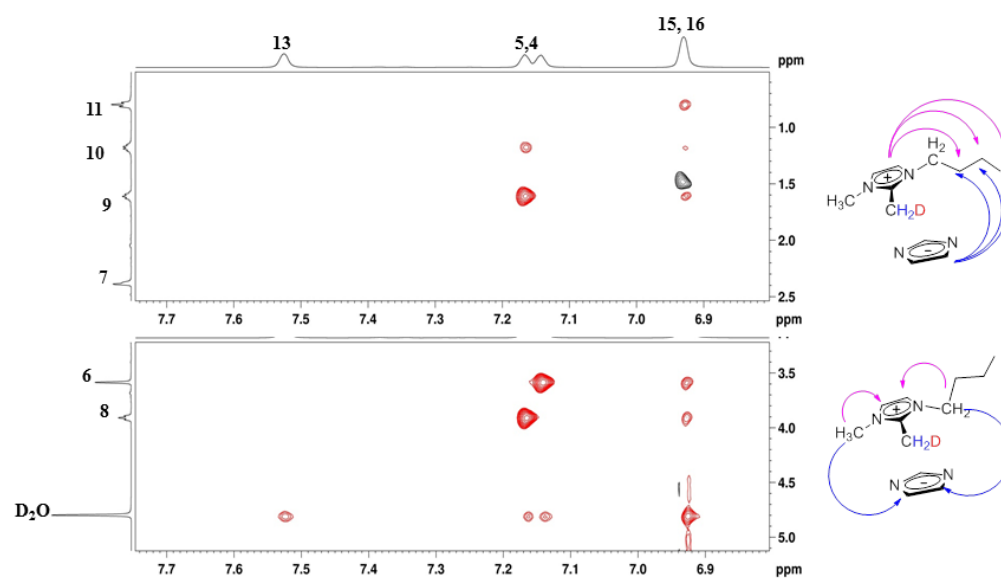

**Figure S35.1.** <sup>1</sup>H-<sup>1</sup>H NOESY NMR (400 MHz, 25 °C) spectrum of BMMI·Im in D<sub>2</sub>O (1 M) after 1h, expansion of H4/H5, H13 and H15/H16.

### 3. X-Ray Diffraction Analysis for MMMI·Im

**Table S1. Crystal data and structure refinement for MMMI·Im**

|                                             |                                                               |
|---------------------------------------------|---------------------------------------------------------------|
| Identification code                         | OJDULA                                                        |
| Empirical formula                           | C <sub>9</sub> H <sub>16</sub> N <sub>4</sub> O               |
| Formula weight                              | 196.26                                                        |
| Temperature/K                               | 120(2)                                                        |
| Crystal system                              | Monoclinic                                                    |
| Space group                                 | P2 <sub>1</sub> /n                                            |
| a/Å                                         | 7.3864(4)                                                     |
| b/Å                                         | 12.0203(7)                                                    |
| c/Å                                         | 12.5938(7)                                                    |
| α/°                                         | 90                                                            |
| β/°                                         | 103.725(6)                                                    |
| γ/°                                         | 90                                                            |
| Volume/Å <sup>3</sup>                       | 1086.24(11)                                                   |
| Z                                           | 4                                                             |
| ρ <sub>calc</sub> /g/cm <sup>3</sup>        | 1.200                                                         |
| μ/mm <sup>-1</sup>                          | 0.669                                                         |
| F(000)                                      | 424.0                                                         |
| Crystal size/mm <sup>3</sup>                | 0.9416 × 0.63 × 0.5186                                        |
| Radiation                                   | CuKα (λ = 1.54184)                                            |
| 2θ range for data collection/°              | 10.316 to 149.746                                             |
| Index ranges                                | -9 ≤ h ≤ 6, -14 ≤ k ≤ 12, -14 ≤ l ≤ 15                        |
| Reflections collected                       | 4439                                                          |
| Independent reflections                     | 2149 [R <sub>int</sub> = 0.0296, R <sub>sigma</sub> = 0.0272] |
| Data/restraints/parameters                  | 2149/0/136                                                    |
| Goodness-of-fit on F <sup>2</sup>           | 1.060                                                         |
| Final R indexes [I >= 2σ (I)]               | R <sub>1</sub> = 0.0509, wR <sub>2</sub> = 0.1423             |
| Final R indexes [all data]                  | R <sub>1</sub> = 0.0542, wR <sub>2</sub> = 0.1456             |
| Largest diff. peak/hole / e Å <sup>-3</sup> | 0.23/-0.26                                                    |



#### 4. DFT Calculations

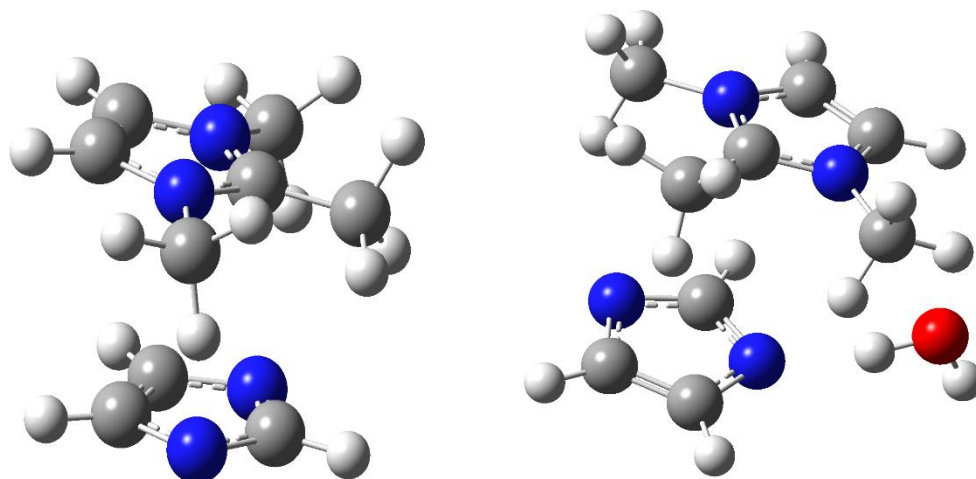

**Figure S36.** Optimized structure obtained by DFT calculation of the ionic pair of MMMI·Im (left) and the ionic pair MMMI·Im (parallel displaced) with water.

**Table S2.** Water

| Atomic Number                          | Coordinates (Å) |           |           |
|----------------------------------------|-----------------|-----------|-----------|
|                                        | X               | Y         | Z         |
| 1                                      | 0.000000        | 0.759537  | -0.466331 |
| 8                                      | 0.000000        | 0.000000  | 0.116583  |
| 1                                      | 0.000000        | -0.759537 | -0.466331 |
| Theory Level: wb97XD//spAug-cc-pVTZ    |                 |           |           |
| Total Molecular Energy: -76.4396415 Ha |                 |           |           |

**Table S3.** 1,2,3-trimethyl-1*H*-imidazol-3-ium

| Atomic Number                                                                  | Coordinates (Å) |           |           |
|--------------------------------------------------------------------------------|-----------------|-----------|-----------|
|                                                                                | X               | Y         | Z         |
| 6                                                                              | 0.046597        | -0.032631 | -0.016606 |
| 6                                                                              | 0.025605        | -0.034840 | 1.332487  |
| 6                                                                              | 2.138510        | -0.100722 | 0.691906  |
| 7                                                                              | 1.366880        | -0.072501 | -0.397435 |
| 1                                                                              | -0.752772       | -0.006147 | -0.733679 |
| 1                                                                              | -0.795996       | -0.010226 | 2.024001  |
| 7                                                                              | 1.333918        | -0.076772 | 1.756960  |
| 6                                                                              | 3.617624        | -0.143952 | 0.690768  |
| 1                                                                              | 3.973663        | -0.969046 | 0.074465  |
| 1                                                                              | 4.026779        | 0.781657  | 0.283984  |
| 1                                                                              | 4.005615        | -0.276375 | 1.696218  |
| 6                                                                              | 1.764121        | -0.097401 | 3.151890  |
| 1                                                                              | 2.288051        | -1.025269 | 3.367611  |
| 1                                                                              | 2.407695        | 0.753667  | 3.358911  |
| 1                                                                              | 0.881984        | -0.034974 | 3.780515  |
| 6                                                                              | 1.858717        | -0.100127 | -1.769684 |
| 1                                                                              | 1.019048        | 0.045221  | -2.441204 |
| 1                                                                              | 2.579079        | 0.699708  | -1.922605 |
| 1                                                                              | 2.323979        | -1.060733 | -1.979386 |
| Theory Level: wB97XD//spAug-cc-pVTZ<br>Total Molecular Energy: -344.5638538 Ha |                 |           |           |

**Table S4.** Imidazol-1-ide

| Atomic Number                                                                   | Coordinates (Å) |           |           |
|---------------------------------------------------------------------------------|-----------------|-----------|-----------|
|                                                                                 | X               | Y         | Z         |
| 6                                                                               | 1.969476        | -2.897942 | 0.690783  |
| 6                                                                               | 3.970586        | -3.288968 | 1.237980  |
| 6                                                                               | 3.867334        | -3.302384 | -0.140605 |
| 7                                                                               | 2.574668        | -3.049741 | -0.496038 |
| 1                                                                               | 0.909697        | -2.683183 | 0.768948  |
| 1                                                                               | 4.843035        | -3.450942 | 1.857780  |
| 1                                                                               | 4.638045        | -3.476776 | -0.880200 |
| 7                                                                               | 2.745014        | -3.027933 | 1.777101  |
| Theory Level : wB97XD//spAug-cc-pVTZ<br>Total Molecular Energy: -225.6471675 Ha |                 |           |           |

**Table S5.** 1,2,3-trimethyl-1*H*-imidazol-3-ium imidazol-1-ide (MMMI-Im) near anti-parallel displaced conformation

| Atomic Number                                                                  | Coordinates (Angstroms) |           |           |
|--------------------------------------------------------------------------------|-------------------------|-----------|-----------|
|                                                                                | X                       | Y         | Z         |
| 6                                                                              | 0.049079                | 0.041674  | -0.017592 |
| 6                                                                              | 0.025972                | 0.021333  | 1.330896  |
| 6                                                                              | 2.137516                | 0.016178  | 0.692845  |
| 7                                                                              | 1.368668                | 0.057967  | -0.398715 |
| 1                                                                              | -0.747674               | 0.040756  | -0.736878 |
| 1                                                                              | -0.795417               | 0.000174  | 2.021608  |
| 7                                                                              | 1.332557                | 0.024389  | 1.758960  |
| 6                                                                              | 3.608759                | -0.019141 | 0.698760  |
| 1                                                                              | 3.949975                | -1.028938 | 0.435368  |
| 1                                                                              | 4.007641                | 0.691844  | -0.023338 |
| 1                                                                              | 3.996961                | 0.218864  | 1.684236  |
| 6                                                                              | 1.772666                | -0.223388 | 3.125011  |
| 1                                                                              | 2.218826                | -1.222791 | 3.156538  |
| 1                                                                              | 2.487890                | 0.536056  | 3.432389  |
| 1                                                                              | 0.904413                | -0.174690 | 3.775313  |
| 6                                                                              | 1.862811                | -0.146603 | -1.752207 |
| 1                                                                              | 1.045627                | 0.025819  | -2.446264 |
| 1                                                                              | 2.663251                | 0.558176  | -1.965261 |
| 6                                                                              | 1.969408                | -2.890887 | 0.690218  |
| 6                                                                              | 3.972885                | -3.283797 | 1.237806  |
| 6                                                                              | 3.870645                | -3.294580 | -0.140080 |
| 7                                                                              | 2.578188                | -3.033254 | -0.494318 |
| 1                                                                              | 0.904063                | -2.708147 | 0.769046  |
| 1                                                                              | 4.839580                | -3.463170 | 1.856397  |
| 1                                                                              | 4.633799                | -3.491160 | -0.878228 |
| 7                                                                              | 2.749286                | -3.012874 | 1.774908  |
| 1                                                                              | 2.219578                | -1.179143 | -1.822553 |
| Theory Level: wB97XD//spAug-cc-pVTZ<br>Total Molecular Energy: -570.3606343 Ha |                         |           |           |

**Table S6.** 1,2,3-trimethyl-1*H*-imidazol-3-ium imidazol-1-ide (MMMI-Im) near parallel displaced conformation

| Atomic Number                           | Coordinates (Å) |           |           |
|-----------------------------------------|-----------------|-----------|-----------|
|                                         | X               | Y         | Z         |
| 6                                       | 0.013099        | 0.516021  | 0.075165  |
| 6                                       | 0.009948        | 0.404827  | 1.418873  |
| 6                                       | 2.025152        | -0.126917 | 0.705532  |
| 7                                       | 1.274489        | 0.184686  | -0.351206 |
| 1                                       | -0.771082       | 0.765524  | -0.613553 |
| 1                                       | -0.777736       | 0.536868  | 2.135428  |
| 7                                       | 1.269683        | 0.008726  | 1.794756  |
| 6                                       | 3.463646        | -0.463520 | 0.659776  |
| 1                                       | 3.652614        | -1.131726 | -0.176523 |
| 1                                       | 4.056803        | 0.447306  | 0.550776  |
| 1                                       | 3.757944        | -0.981830 | 1.566517  |
| 6                                       | 1.661729        | -0.390045 | 3.140017  |
| 1                                       | 1.757056        | -1.480311 | 3.150485  |
| 1                                       | 2.594385        | 0.096582  | 3.414929  |
| 1                                       | 0.882647        | -0.075123 | 3.827389  |
| 6                                       | 1.688539        | -0.012087 | -1.731147 |
| 1                                       | 0.884516        | 0.318053  | -2.381432 |
| 1                                       | 2.582247        | 0.571246  | -1.942023 |
| 6                                       | 2.222649        | -3.284471 | 0.749519  |
| 6                                       | 0.368633        | -2.866020 | -0.176530 |
| 6                                       | 0.171068        | -3.008726 | 1.180322  |
| 7                                       | 1.368798        | -3.271738 | 1.780654  |
| 1                                       | 3.277212        | -3.490170 | 0.883618  |
| 1                                       | -0.359030       | -2.675426 | -0.953403 |
| 1                                       | -0.750342       | -2.958992 | 1.742895  |
| 7                                       | 1.694685        | -3.033127 | -0.457360 |
| 1                                       | 1.876750        | -1.079070 | -1.873265 |
| Theory Level: wB97XD//spAug-cc-pVTZ     |                 |           |           |
| Total Molecular Energy: -570.3577295 Ha |                 |           |           |

**Table S7.** Hydrated 1,2,3-trimethyl-1H-imidazol-3-ium imidazol-1-ide  
[MMMI·Im]·[H<sub>2</sub>O] near anti-parallel displaced conformation

| Atomic Number                           | Coordinates (Å) |           |           |
|-----------------------------------------|-----------------|-----------|-----------|
|                                         | X               | Y         | Z         |
| 6                                       | 0.140387        | -0.549890 | -0.122112 |
| 6                                       | 0.038714        | -0.134172 | 1.157152  |
| 6                                       | 2.166361        | -0.046200 | 0.589663  |
| 7                                       | 1.466699        | -0.469983 | -0.463004 |
| 1                                       | -0.589967       | -0.943322 | -0.802536 |
| 1                                       | -0.811209       | -0.062289 | 1.808682  |
| 7                                       | 1.308009        | 0.188957  | 1.582563  |
| 6                                       | 3.632766        | 0.089307  | 0.632151  |
| 1                                       | 4.075851        | -0.909994 | 0.711985  |
| 1                                       | 3.999122        | 0.571567  | -0.272784 |
| 1                                       | 3.945915        | 0.666060  | 1.497015  |
| 6                                       | 1.690574        | 0.462140  | 2.960193  |
| 1                                       | 2.248644        | -0.397562 | 3.340543  |
| 1                                       | 2.291042        | 1.367664  | 3.010665  |
| 1                                       | 0.784165        | 0.608986  | 3.539499  |
| 6                                       | 2.056523        | -0.911038 | -1.717064 |
| 1                                       | 1.289206        | -1.417985 | -2.291247 |
| 1                                       | 2.455424        | -0.057846 | -2.263130 |
| 6                                       | 2.094435        | -2.836887 | 1.785219  |
| 6                                       | 4.195486        | -2.955739 | 1.987593  |
| 6                                       | 3.845547        | -3.424234 | 0.738695  |
| 7                                       | 2.488333        | -3.340032 | 0.606597  |
| 1                                       | 1.047814        | -2.674410 | 2.007310  |
| 1                                       | 5.174366        | -2.886794 | 2.437090  |
| 1                                       | 4.471487        | -3.825327 | -0.043850 |
| 7                                       | 3.069689        | -2.566389 | 2.655618  |
| 1                                       | 2.838256        | -1.633782 | -1.495215 |
| 8                                       | 0.470596        | -3.426542 | -1.233257 |
| 1                                       | 0.112161        | -4.311148 | -1.284947 |
| 1                                       | 1.236447        | -3.490294 | -0.596468 |
| Theory Level: wB97XD//spAug-cc-pVTZ     |                 |           |           |
| Total Molecular Energy: -646.8268967 Ha |                 |           |           |

**Table S8.** Hydrated 1,2,3-trimethyl-1H-imidazol-3-iumimidazol-1-ide [MMMI·Im]·[H<sub>2</sub>O] near parallel displaced conformation

| Atomic Number                           | Coordinates (Å) |           |           |
|-----------------------------------------|-----------------|-----------|-----------|
|                                         | X               | Y         | Z         |
| 6                                       | -2.169168       | -1.173654 | 0.264367  |
| 6                                       | -2.323801       | -1.536966 | 1.552840  |
| 6                                       | -0.326769       | -0.622368 | 1.343144  |
| 7                                       | -0.929675       | -0.595789 | 0.153013  |
| 1                                       | -2.812429       | -1.300969 | -0.585033 |
| 1                                       | -3.133416       | -2.034470 | 2.051562  |
| 7                                       | -1.170399       | -1.186389 | 2.210019  |
| 6                                       | 0.998504        | -0.060610 | 1.676112  |
| 1                                       | 1.599418        | 0.033898  | 0.777036  |
| 1                                       | 0.884584        | 0.921443  | 2.140191  |
| 1                                       | 1.523453        | -0.723692 | 2.364212  |
| 6                                       | -0.902773       | -1.404434 | 3.624344  |
| 1                                       | 0.072234        | -1.876796 | 3.751321  |
| 1                                       | -0.934412       | -0.455903 | 4.158108  |
| 1                                       | -1.674564       | -2.061317 | 4.013869  |
| 6                                       | -0.343054       | -0.118346 | -1.093054 |
| 1                                       | -1.144046       | 0.000120  | -1.816711 |
| 1                                       | 0.129691        | 0.846779  | -0.930125 |
| 6                                       | 1.804627        | -2.766324 | -0.042725 |
| 6                                       | 0.028122        | -3.659450 | -0.766787 |
| 6                                       | 0.113356        | -3.890841 | 0.587761  |
| 7                                       | 1.256676        | -3.310758 | 1.055514  |
| 1                                       | 2.747005        | -2.235917 | -0.008010 |
| 1                                       | -0.728005       | -3.984820 | -1.465652 |
| 1                                       | -0.549969       | -4.443793 | 1.235714  |
| 7                                       | 1.112867        | -2.934258 | -1.169652 |
| 1                                       | 0.373555        | -0.861183 | -1.451199 |
| 1                                       | 1.778099        | -2.977758 | 2.597775  |
| 8                                       | 2.006207        | -2.595503 | 3.504605  |
| 1                                       | 2.700407        | -3.145372 | 3.863742  |
| Theory Level: wB97XD//spAug-cc-pVTZ     |                 |           |           |
| Total Molecular Energy: -646.8250085 Ha |                 |           |           |

**Table S9.** Bond Lengths in Å.

| Entry | Atom | Atom | Crystallographic | Theoretical |
|-------|------|------|------------------|-------------|
| 1     | N1   | C2   | 1.3321(17)       | 1.3334      |
| 2     | N1   | C5   | 1.3772(17)       | 1.3771      |
| 3     | N1   | C6   | 1.4642(18)       | 1.4556      |
| 4     | C2   | N3   | 1.3360(17)       | 1.3407      |
| 5     | C2   | C7   | 1.4793(18)       | 1.4733      |
| 6     | N3   | C4   | 1.3804(18)       | 1.3717      |
| 7     | N3   | C8   | 1.4641(19)       | 1.4543      |
| 8     | C4   | C5   | 1.342(2)         | 1.3489      |
| 9     | N9   | C10  | 1.343(2)         | 1.3401      |
| 10    | N9   | C13  | 1.374(2)         | 1.3662      |
| 11    | C10  | N11  | 1.3320(19)       | 1.3349      |
| 12    | N11  | C12  | 1.3688(18)       | 1.3657      |
| 13    | C12  | C13  | 1.360(2)         | 1.3790      |

**Table S10.** Bond Angles in °.

| Entry | Atom | Atom | Atom | Crystallographic | Theoretical |
|-------|------|------|------|------------------|-------------|
| 1     | C2   | N1   | C5   | 109.28(11)       | 108.78      |
| 2     | C2   | N1   | C6   | 125.48(12)       | 124.66      |
| 3     | C5   | N1   | C6   | 125.04(12)       | 125.34      |
| 4     | N1   | C2   | N3   | 107.38(11)       | 107.83      |
| 5     | N1   | C2   | C7   | 126.97(12)       | 127.09      |
| 6     | N3   | C2   | C7   | 125.62(13)       | 124.36      |
| 7     | C2   | N3   | C4   | 109.25(11)       | 109.25      |
| 8     | C2   | N3   | C8   | 125.03(12)       | 124.36      |
| 9     | C4   | N3   | C8   | 125.72(12)       | 125.45      |
| 10    | C5   | C4   | N3   | 106.84(12)       | 106.89      |
| 11    | C4   | C5   | N1   | 107.24(12)       | 107.21      |
| 12    | C10  | N9   | C13  | 102.69(12)       | 103.30      |
| 13    | N11  | C10  | N9   | 115.73(13)       | 115.76      |
| 14    | C10  | N11  | C12  | 103.08(12)       | 103.03      |
| 15    | C13  | C12  | N11  | 109.36(13)       | 109.31      |
| 16    | C12  | C13  | N9   | 109.15(13)       | 108.58      |

**Table S11.** Torsion Angles (degree)

| A   | B   | C   | D   | Crystallographic | Theoretical |
|-----|-----|-----|-----|------------------|-------------|
|     |     |     |     | Angles (°)       |             |
| N1  | C2  | N3  | C4  | -0.62(14)        | -0.26       |
| N1  | C2  | N3  | C8  | 178.66(12)       | -175.92     |
| C2  | N1  | C5  | C4  | 0.29(15)         | -0.98       |
| C2  | N3  | C4  | C5  | 0.80(15)         | 1.42        |
| N3  | C4  | C5  | N1  | -0.65(15)        | -0.26       |
| C5  | N1  | C2  | N3  | 0.21(14)         | 1.87        |
| C5  | N1  | C2  | C7  | -177.90(13)      | -176.41     |
| C6  | N1  | C2  | N3  | -174.90(12)      | 169.84      |
| C6  | N1  | C2  | C7  | 7.0(2)           | -0.34       |
| C6  | N1  | C5  | C4  | 175.43(13)       | -168.54     |
| C7  | C2  | N3  | C4  | 177.52(13)       | 176.28      |
| C7  | C2  | N3  | C8  | -3.2(2)          | 2.40        |
| C8  | N3  | C4  | C5  | -178.47(13)      | 175.17      |
| N9  | C10 | N11 | C12 | -0.15(16)        | -1.28       |
| C10 | N9  | C13 | C12 | -0.15(16)        | -0.50       |
| C10 | N11 | C12 | C13 | 0.05(16)         | 0.86        |
| N11 | C12 | C13 | N9  | 0.07(17)         | -0.24       |
| C13 | N9  | C10 | N11 | 0.07(17)         | 1.15        |

## 5. Molecular Dynamics Simulations

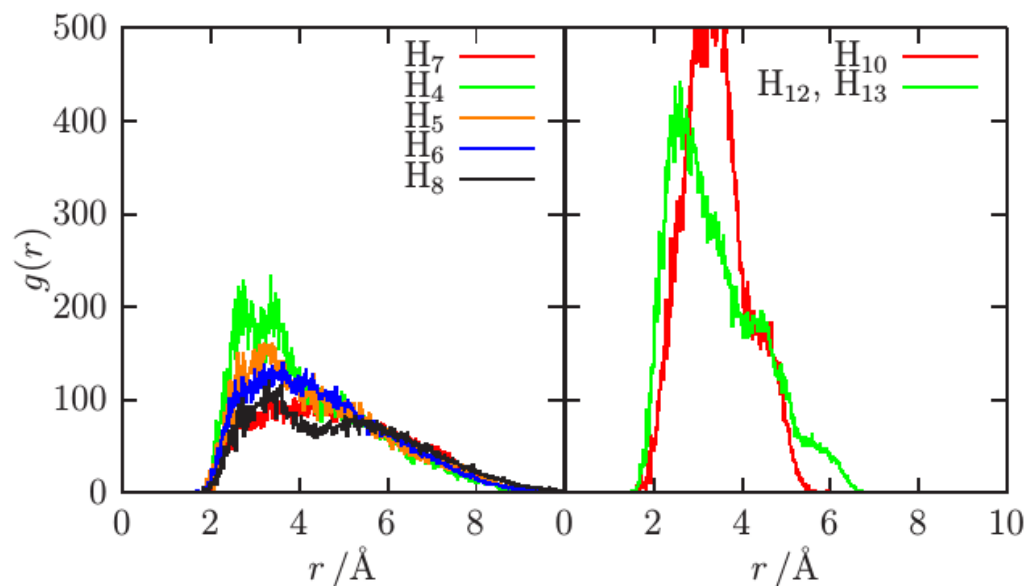

**Figure S37.** Radial distribution functions for distances between the water protons and the hydrogens of the cation (left panel) and the anion (right panel) for the BMMI system.



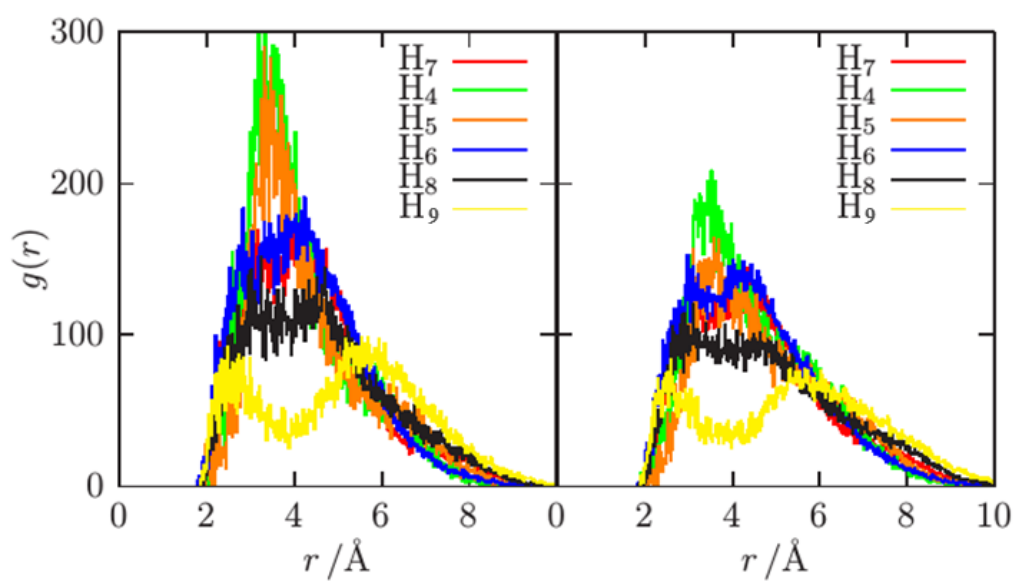

**Figure S38.** Radial distribution functions for distances between the cation's hydrogens and the anion's H10 (left panel) and the anion's H12 and H13 (right panel) in the BMMI system.
